# Supplementary material for: Evolving landscape of geriatric colorectal cancer: Global and regional burden, risk factor dynamics, and future scenarios (the Global Burden of Disease 1990–2040)
Source: Research Square preprint supplement (doi:10.21203/rs.3.rs-7297355/v1), 2025-09-12
Supplement: Supplementary file 1 [file f17f6cc026341724a107e0f7.docx]

**Supplementary data**

**Supplementary Table1**：DALYs and death of geriatric colorectal cancer between 1990 and 2021.

|  | DALYs | | | | | |  | | | |  | | | |  | Deaths | | | | | | |  | | | |  | | | |  | | |  | |
| --- | --- | --- | --- | --- | --- | --- | --- | --- | --- | --- | --- | --- | --- | --- | --- | --- | --- | --- | --- | --- | --- | --- | --- | --- | --- | --- | --- | --- | --- | --- | --- | --- | --- | --- | --- |
| Location | Cases (n),1990 | Prevalence(per 100,000 population),1990 | | | | | Cases (n),2021 | Prevalence(per 100,000 population),2021 | | | | AAPC,1990–2021 | | | | | Cases (n),1990 | | | Incidence(per 100,000 population),1990 | | | | Cases (n),2021 | | | | Incidence(per 100,000 population),2021 | | | | AAPC,1990–2021 | | | | |
| Global | 2,824,106(2,585,532-2,962,952) | | 2,462.35(2,218.50-2,602.57) | | 5,728,257(5,038,383-6,201,686) | | | | 2,000.51(1,731.58-2,177.48) | | | | -14.832(-15.179--14.485) | | | | | 207,829(187,252-218,367) | | | 191.71(170.69-203.03) | | | | 443,460(385,191-479,790) | | | | 156.70(133.78-171.06) | | | | -1.113(-1.138--1.089) | | | |
| Sex |  | |  | |  | | | |  | | | |  | | | | |  | | |  | | | |  | | | |  | | | |  | | | |
| Male | 1,241,921(1,156,611-1,297,858) | | 2,814.13(2,605.15-2,964.27) | | 2,946,736(2,654,766-3,218,693) | | | | 2,487.31(2,208.99-2,726.75) | | | | -10.573(-11.232--9.913) | | | | | 89,009(82,665-92,869) | | | 217.12(199.34-229.09) | | | | 220,890(196,632-241,578) | | | | 193.50(170.23-212.55) | | | | -0.715(-0.759--0.672) | | | |
| Female | 1,582,185(1,406,620-1,680,008) | | 2,243.71(1,975.71-2,404.29) | | 2,781,521(2,316,585-3,080,967) | | | | 1,650.55(1,359.57-1,835.36) | | | | -19.099(-19.430--18.768) | | | | | 118,820(104,305-126,573) | | | 176.31(153.36-189.53) | | | | 222,570(182,842-246,576) | | | | 131.13(106.37-146.30) | | | | -1.433(-1.469--1.397) | | | |
| Sociodemographic index | | | | | | |  |  | | | |  | | | | |  | | |  | | | |  | | | |  | | | |  | | | | |
| High SDI | 1,571,528(1,422,278-1,657,474) | | 3,611.62(3,228.94-3,837.95) | | 2,387,759(2,010,818-2,610,411) | | | | 2,586.31(2,183.14-2,829.34) | | | | -33.567(-34.003--33.131) | | | | | 117,459(104,336-124,092) | | | 278.36(245.20-296.72) | | | | 191,568(158,444-210,475) | | | | 201.20(166.53-220.88) | | | | -2.507(-2.553--2.460) | | | |
| High-middle SDI | 791,716(731,043-830,211) | | 2,579.80(2,351.12-2,730.79) | | 1,720,132(1,524,011-1,879,967) | | | | 2,510.96(2,190.56-2,770.23) | | | | -2.237(-3.094--1.380) | | | | | 57,148(52,374-59,920) | | | 198.44(178.61-210.51) | | | | 131,463(116,041-143,162) | | | | 192.86(166.40-212.75) | | | | -0.182(-0.256--0.108) | | | |
| Middle SDI | 328,664(296,369-357,401) | | 1,386.83(1,239.92-1,518.72) | | 1,202,872(1,048,556-1,333,777) | | | | 1,521.96(1,309.65-1,707.84) | | | | 4.609(3.634-5.583) | | | | | 23,729(21,319-25,785) | | | 107.55(95.90-117.86) | | | | 89,559(77,650-99,467) | | | | 117.11(100.20-131.08) | | | | 0.323(0.264-0.382) | | | |
| Low middle SDI | 88,507(77,097-99,064) | | | 632.05(542.12-715.31) | | 300,607(275,218-328,834) | | | | 780.01(699.28-859.04) | | | | 4.947(4.434-5.460) | | | | | 6,406(5,593-7,178) | | | 48.69(41.60-55.27) | | | | 22,218(20,249-24,293) | | | | 60.40(53.60-66.67) | | | | | 0.391(0.334-0.448) | | | |
| Low SDI | 39,379(32,437-44,375) | | | 833.72(683.54-950.65) | | 109,055(97,936-119,755) | | | | 966.82(852.61-1,079.05) | | | | 4.477(3.857-5.097) | | | | | 2,770(2,285-3,119) | | | 63.18(51.85-72.24) | | | | 8,047(7,199-8,851) | | | | 76.21(66.75-85.22) | | | | | 0.443(0.394-0.491) | | | |
| Region |  | | |  | |  | | | |  | | | |  | | | | |  | | |  | | | |  | | | |  | | | | |  | | | |
| Andean Latin America | 8,124(7,083-9,265) | | | 1,345.48(1,124.88-1,583.78) | | 31,804(25,318-38,181) | | | | 1,605.16(1,249.16-1,996.07) | | | | 8.644(6.955-10.333) | | | | | 624(544-707) | | | 105.50(88.02-124.31) | | | | 2,456(1,966-2,940) | | | | 124.78(96.97-155.42) | | | | | 0.827(0.652-1.002) | | | |
| Australasia | 32,489(28,739-35,456) | | | 3,737.16(3,235.49-4,185.74) | | 61,468(51,219-70,919) | | | | 2,682.34(2,225.15-3,115.84) | | | | -36.982(-39.229--34.736) | | | | | 2,381(2,081-2,622) | | | 285.42(243.90-320.55) | | | | 4,813(3,990-5,567) | | | | 206.49(169.11-240.23) | | | | | -2.784(-3.013--2.555) | | | |
| Caribbean | 18,762(17,229-20,142) | | | 2,201.39(1,978.53-2,412.82) | | 46,532(40,776-52,320) | | | | 2,366.06(2,011.22-2,713.32) | | | | 5.272(4.250-6.293) | | | | | 1,406(1,281-1,511) | | | 172.81(154.33-190.37) | | | | 3,588(3,142-4,053) | | | | 181.36(153.65-208.07) | | | | | 0.308(0.217-0.398) | | | |
| Central Asia | 15,709(14,317-16,971) | | | 1,052.50(953.61-1,139.21) | | 19,360(17,361-21,177) | | | | 987.17(875.01-1,087.25) | | | | -1.077(-2.274-0.119) | | | | | 1,111(1,010-1,201) | | | 76.06(68.43-82.59) | | | | 1,430(1,274-1,568) | | | | 72.56(64.07-80.02) | | | | | -0.059(-0.156-0.037) | | | |
| Central Europe | 168,543(159,371-176,341) | | | 3,245.38(3,022.15-3,420.12) | | 311,239(282,320-334,240) | | | | 3,499.61(3,154.45-3,777.20) | | | | 8.366(7.216-9.517) | | | | | 12,208(11,483-12,770) | | | 247.19(228.86-260.93) | | | | 23,897(21,435-25,711) | | | | 267.79(239.44-289.60) | | | | | 0.656(0.559-0.753) | | | |
| Central Latin America | 25,977(24,019-27,301) | | | 1,121.28(1,030.96-1,189.68) | | 104,342(91,815-116,644) | | | | 1,282.13(1,116.57-1,439.43) | | | | 5.119(4.433-5.805) | | | | | 1,976(1,823-2,079) | | | 88.83(80.96-94.44) | | | | 7,931(6,936-8,872) | | | | 98.06(84.76-110.26) | | | | | 0.289(0.229-0.348) | | | |
| Central Sub-Saharan Africa | 3,466(2,791-4,323) | | | 971.46(744.82-1,281.45) | | 9,799(7,510-13,821) | | | | 1,014.24(729.24-1,489.38) | | | | 1.532(1.381-1.682) | | | | | 239(192-299) | | | 73.97(56.33-98.82) | | | | 706(538-1,016) | | | | 78.00(55.33-117.24) | | | | | 0.144(0.134-0.154) | | | |
| East Asia | 385,234(336,833-434,230) | | | 2,053.60(1,765.51-2,335.98) | | 1,444,133(1,194,325-1,689,659) | | | | 2,127.96(1,737.49-2,497.84) | | | | 2.722(0.997-4.447) | | | | | 27,271(23,768-30,638) | | | 161.53(138.52-184.15) | | | | 107,136(87,909-123,991) | | | | 164.13(133.51-192.62) | | | | | 0.111(-0.021-0.244) | | |
| Eastern Europe | 221,872(210,102-231,313) | | | 2,153.60(2,018.48-2,275.45) | | 315,806(287,384-339,215) | | | | 2,608.05(2,360.21-2,829.95) | | | | 12.472(10.181-14.763) | | | | | 15,481(14,576-16,163) | | | 158.17(147.06-167.10) | | | | 24,232(21,888-26,160) | | | | 194.81(174.54-211.68) | | | | | 1.008(0.825-1.191) | | |
| Eastern Sub-Saharan Africa | 19,857(16,363-22,419) | | | 1,292.04(1,049.78-1,488.09) | | 58,651(51,304-65,847) | | | | 1,655.84(1,410.88-1,900.22) | | | | 12.038(11.675-12.402) | | | | | 1,396(1,153-1,574) | | | 98.07(79.75-113.17) | | | | 4,400(3,844-4,957) | | | | 131.64(111.70-151.46) | | | | | 1.118(1.090-1.146) | | |
| High-income Asia Pacific | 194,161(175,308-205,372) | | | 2,939.17(2,607.79-3,143.71) | | 642,092(513,015-716,775) | | | | 2,663.30(2,165.08-2,973.32) | | | | -11.330(-12.752--9.908) | | | | | 14,258(12,744-15,112) | | | 226.49(197.93-242.95) | | | | 53,102(41,228-59,727) | | | | 207.72(163.76-233.56) | | | | | -0.743(-0.843--0.644) | | |
| High-income North America | 476,957(420,785-508,409) | | | 3,340.29(2,928.54-3,587.56) | | 531,463(450,323-579,389) | | | | 2,024.22(1,715.63-2,218.06) | | | | -43.866(-45.018--42.713) | | | | | 35,517(30,656-38,019) | | | 252.94(217.15-271.92) | | | | 41,437(34,400-45,350) | | | | 155.35(128.28-170.47) | | | | | -3.120(-3.218--3.022) | | |
| North Africa and Middle East | 45,842(40,443-52,013) | | | 1,223.29(1,033.01-1,432.03) | | 152,006(132,095-171,600) | | | | 1,366.90(1,152.97-1,590.98) | | | | 4.684(3.827-5.541) | | | | | 3,411(2,986-3,853) | | | 95.67(80.12-112.79) | | | | 11,402(9,917-12,853) | | | | 106.22(88.97-123.98) | | | | | 0.355(0.288-0.421) | | |
| Oceania | 393(339-450) | | | 864.84(732.21-1,008.06) | | 1,048(900-1,190) | | | | 762.80(640.15-882.14) | | | | -3.582(-3.935--3.229) | | | | | 28(24-32) | | | 67.94(57.36-79.29) | | | | 77(66-87) | | | | 59.77(49.94-69.28) | | | | | -0.291(-0.322--0.259) | | |
| South Asia | 53,013(44,147-61,483) | | | 428.23(349.10-502.70) | | 195,475(176,454-217,594) | | | | 494.57(438.68-557.58) | | | | 2.357(1.703-3.011) | | | | | 3,802(3,149-4,426) | | | 32.93(26.70-38.85) | | | | 14,428(12,976-16,007) | | | | 38.58(34.01-43.55) | | | | | 0.194(0.133-0.254) | | |
| Southeast Asia | 71,926(62,109-80,710) | | | 1,214.64(1,024.34-1,391.50) | | 281,657(244,936-315,884) | | | | 1,705.61(1,454.63-1,959.94) | | | | 15.597(15.122-16.072) | | | | | 5,282(4,590-5,915) | | | 93.56(78.66-107.44) | | | | 20,983(18,244-23,521) | | | | 131.23(110.98-151.42) | | | | | 1.198(1.164-1.233) | | |
| Southern Latin America | 49,105(44,261-53,328) | | | 3,206.98(2,785.91-3,620.91) | | 97,618(84,537-109,707) | | | | 2,863.06(2,381.49-3,326.31) | | | | -9.470(-12.004--6.937) | | | | | 3,673(3,289-3,992) | | | 249.93(216.19-282.86) | | | | 7,660(6,573-8,656) | | | | 224.58(185.60-261.10) | | | | | -0.679(-0.863--0.495) | | |
| Southern Sub-Saharan Africa | 9,248(7,908-11,662) | | | 1,338.56(1,121.47-1,703.46) | | 23,723(21,414-25,780) | | | | 1,671.04(1,472.62-1,864.95) | | | | 11.321(10.445-12.196) | | | | | 722(615-913) | | | 107.59(89.85-137.34) | | | | 1,786(1,608-1,942) | | | | 131.72(115.58-147.13) | | | | | 0.912(0.773-1.051) | | |
| Tropical Latin America | 33,695(30,706-35,716) | | | 1,406.84(1,256.96-1,516.80) | | 130,289(112,590-141,793) | | | | 1,535.15(1,312.90-1,689.07) | | | | 3.786(2.639-4.933) | | | | | 2,488(2,250-2,645) | | | 110.09(97.25-119.36) | | | | 10,065(8,557-10,965) | | | | 119.15(100.40-131.84) | | | | | 0.265(0.172-0.359) | | |
| Western Europe | 973,241(887,152-1,029,364) | | | 3,948.87(3,540.79-4,231.35) | | 1,226,711(1,026,464-1,348,462) | | | | 2,747.70(2,315.66-3,023.73) | | | | -38.185(-39.073--37.296) | | | | | 73,365(65,807-77,912) | | | 308.06(273.37-331.41) | | | | 98,755(81,397-109,061) | | | | 213.72(176.86-236.08) | | | | | -3.043(-3.142--2.944) | | |
| Western Sub-Saharan Africa | 16,491(14,201-18,813) | | | 776.23(662.53-887.05) | | 43,042(38,327-48,380) | | | | 977.31(854.88-1,106.90) | | | | 6.553(6.264-6.842) | | | | | 1,190(1,018-1,354) | | | 59.55(50.62-68.22) | | | | 3,176(2,840-3,561) | | | | 76.09(66.50-86.02) | | | | | 0.536(0.519-0.553) | | |

**Supplementary Table 2** Prevalence of 204 countries and regions

| Location | Cases (n),1990 | Prevalence(per 100,000 population),1990 | Cases (n),2021 | Prevalence(per 100,000 population),2021 | AAPC,1990–2021 |
| --- | --- | --- | --- | --- | --- |
| Afghanistan | 247(159-342) | 152.60(97.20-215.10) | 468(315-638) | 198.85(131.46-275.28) | 1.51(1.45-1.57) |
| Albania | 131(110-155) | 239.03(191.21-292.90) | 579(460-738) | 351.97(267.63-461.19) | 4.02(3.71-4.33) |
| Algeria | 486(394-591) | 176.54(138.10-225.37) | 2,259(1,787-2,860) | 241.68(177.61-320.14) | 2.25(2.19-2.31) |
| American Samoa | 1.3(1.1-1.5) | 284.98(224.99-357.31) | 4.3(3.6-5.2) | 347.24(275.37-433.46) | 2.23(1.99-2.46) |
| Andorra | 36(26-48) | 1,803.03(1,284.98-2,474.97) | 118(88-154) | 2,046.96(1,444.80-2,821.57) | 11.17(7.76-14.59) |
| Angola | 61(47-78) | 98.81(72.10-130.73) | 290(219-381) | 138.23(100.20-190.97) | 1.30(1.26-1.34) |
| Antigua and Barbuda | 12(11-14) | 518.60(444.99-607.82) | 32(28-37) | 979.30(824.04-1,147.68) | 15.11(13.65-16.58) |
| Argentina | 6,591(5,819-7,344) | 604.70(510.29-707.18) | 16,537(14,493-18,803) | 750.68(624.10-884.52) | 5.33(4.52-6.13) |
| Armenia | 210(185-234) | 259.15(223.08-296.25) | 624(544-711) | 457.44(393.38-530.36) | 6.23(5.52-6.93) |
| Australia | 13,251(11,731-14,793) | 1,798.12(1,545.07-2,064.98) | 41,815(35,088-48,139) | 2,189.33(1,809.74-2,570.21) | 10.64(8.10-13.19) |
| Austria | 7,707(6,880-8,505) | 1,399.36(1,192.73-1,616.44) | 11,038(9,473-12,556) | 1,356.78(1,120.84-1,588.31) | -0.42(-2.00-1.16) |
| Azerbaijan | 197(166-229) | 131.08(105.69-157.89) | 312(251-377) | 152.08(115.86-190.77) | 0.79(0.62-0.97) |
| Bahamas | 21(19-24) | 435.09(368.92-509.30) | 98(81-119) | 855.63(682.00-1,054.85) | 13.33(11.78-14.89) |
| Bahrain | 11(9-14) | 399.05(310.28-508.26) | 75(61-95) | 812.81(621.41-1,081.88) | 14.34(13.44-15.25) |
| Bangladesh | 607(473-773) | 45.47(33.54-61.23) | 2,791(2,167-3,799) | 66.30(48.30-92.32) | 0.75(0.69-0.81) |
| Barbados | 105(94-121) | 744.79(632.25-880.66) | 317(254-390) | 1,647.28(1,292.73-2,064.25) | 30.29(28.26-32.33) |
| Belarus | 2,474(2,132-2,856) | 502.58(423.60-597.28) | 5,137(4,097-6,300) | 961.83(749.88-1,206.69) | 15.12(12.87-17.36) |
| Belgium | 11,366(9,981-12,652) | 1,689.97(1,410.86-1,979.80) | 17,813(15,125-20,300) | 1,726.64(1,405.93-2,075.51) | 0.07(-1.10-1.24) |
| Belize | 7.2(6.5-8) | 220.30(190.85-254.13) | 30(26-35) | 376.80(312.96-445.98) | 4.71(4.08-5.35) |
| Benin | 47(39-56) | 79.04(61.78-99.47) | 142(113-176) | 110.20(82.46-145.06) | 1.02(0.98-1.06) |
| Bermuda | 35(31-40) | 1,648.01(1,377.48-1,958.95) | 179(147-225) | 3,088.49(2,446.85-3,889.14) | 46.86(43.59-50.13) |
| Bhutan | 2.1(1.3-2.7) | 46.52(29.08-64.50) | 16(12-21) | 82.12(56.49-113.23) | 1.18(1.17-1.20) |
| Bolivia (Plurinational State of) | 213(141-289) | 246.47(157.56-344.70) | 1,154(766-1,544) | 440.44(283.77-632.36) | 6.50(6.37-6.63) |
| Bosnia and Herzegovina | 436(373-505) | 380.35(314.41-455.50) | 1,858(1,518-2,251) | 815.23(652.29-1,007.36) | 15.00(14.37-15.64) |
| Botswana | 18(14-23) | 162.15(119.21-216.43) | 63(51-79) | 199.81(150.25-268.42) | 1.15(0.93-1.37) |
| Brazil | 5,180(4,769-5,559) | 214.25(193.26-234.14) | 30,799(27,181-33,382) | 369.57(320.17-407.08) | 5.03(4.81-5.25) |
| Brunei Darussalam | 18(14-21) | 662.66(514.84-847.22) | 57(47-71) | 796.15(630.85-1,001.53) | 3.96(3.35-4.57) |
| Bulgaria | 2,291(1,970-2,624) | 535.99(451.00-633.82) | 6,422(5,385-7,642) | 1,011.96(838.06-1,212.19) | 15.16(13.61-16.70) |
| Burkina Faso | 89(71-109) | 85.30(65.34-110.05) | 273(214-345) | 117.88(87.46-155.07) | 1.04(0.98-1.09) |
| Burundi | 67(54-82) | 108.90(82.71-138.93) | 120(91-155) | 127.85(92.67-171.46) | 0.62(0.57-0.68) |
| Cabo Verde | 9(7.6-11) | 91.99(72.15-115.86) | 39(29-47) | 297.04(209.15-388.98) | 7.17(6.87-7.47) |
| Cambodia | 155(116-199) | 156.41(115.06-206.53) | 779(600-981) | 266.13(197.17-347.38) | 3.55(3.50-3.59) |
| Cameroon | 107(88-132) | 108.58(84.66-138.06) | 394(295-515) | 143.27(102.87-193.47) | 1.09(1.03-1.16) |
| Canada | 23,142(20,643-25,812) | 1,871.70(1,588.49-2,196.19) | 64,887(56,578-72,741) | 2,192.63(1,803.57-2,563.57) | 11.17(9.22-13.11) |
| Central African Republic | 18(14-24) | 109.01(79.86-149.16) | 34(25-46) | 111.04(78.56-157.48) | 0.07(0.04-0.10) |
| Chad | 55(45-70) | 67.66(52.07-89.35) | 136(106-170) | 102.33(76.83-133.81) | 1.13(1.11-1.15) |
| Chile | 1,295(1,163-1,443) | 404.64(347.70-473.39) | 7,749(6,706-8,731) | 808.51(661.84-959.95) | 12.91(12.14-13.69) |
| China | 64,778(56,258-74,357) | 341.09(289.56-400.56) | 612,442(509,330-709,364) | 895.18(735.44-1,048.00) | 18.21(17.72-18.70) |
| Colombia | 1,345(1,193-1,522) | 273.83(233.91-317.50) | 12,464(10,014-15,167) | 650.00(513.02-804.65) | 12.19(11.74-12.63) |
| Comoros | 4.9(3.8-6.1) | 120.84(90.35-158.90) | 22(16-28) | 172.44(121.82-235.42) | 1.60(1.53-1.66) |
| Congo | 28(22-36) | 138.66(102.21-181.37) | 86(70-105) | 167.74(128.11-218.14) | 0.98(0.89-1.06) |
| Cook Islands | 0.61(0.5-0.71) | 182.67(140.20-231.18) | 2.3(1.9-2.9) | 240.62(178.75-319.19) | 1.78(1.67-1.88) |
| Costa Rica | 263(230-295) | 452.41(382.06-530.91) | 2,080(1,767-2,410) | 1,110.09(895.14-1,345.67) | 20.92(18.32-23.51) |
| Côte d'Ivoire | 43(36-52) | 65.91(51.26-84.03) | 171(138-216) | 75.63(57.76- 99.55) | 0.32(0.28-0.35) |
| Croatia | 2,057(1,788-2,333) | 1,134.13(957.82-1,322.81) | 6,916(5,708-8,335) | 1,791.36(1,455.40-2,185.91) | 19.62(16.73-22.51) |
| Cuba | 3,212(2,864-3,590) | 828.66(705.35-969.12) | 13,354(11,169-15,763) | 1,717.93(1,353.15-2,118.63) | 29.08(28.06-30.09) |
| Cyprus | 291(233-362) | 1,153.23(843.93-1,505.83) | 1,504(1,224-1,828) | 1,859.29(1,428.57-2,371.89) | 22.66(21.54-23.78) |
| Czechia | 5,891(5,249-6,619) | 1,019.47(877.24-1,184.40) | 12,479(10,594-14,543) | 1,335.45(1,097.49-1,608.21) | 10.27(9.10-11.45) |
| Democratic People's Republic of Korea | 743(588-971) | 207.45(156.68-277.15) | 2,731(1,912-3,818) | 235.86(162.63-342.98) | 0.85(0.70-1.00) |
| Democratic Republic of the Congo | 229(179-302) | 93.68(69.14-129.24) | 702(498-1,038) | 104.82(69.98-163.09) | 0.34(0.33-0.36) |
| Denmark | 4,385(3,883-4,884) | 1,210.65(1,034.94-1,394.71) | 11,151(9,650-12,551) | 2,064.88(1,724.27-2,401.24) | 28.84(27.17-30.51) |
| Djibouti | 2.7(2.1-3.6) | 134.03(99.27-182.18) | 22(17-29) | 218.01(157.94-293.11) | 2.75(2.72-2.78) |
| Dominica | 9.8(8-12) | 421.69(327.91-540.11) | 16(13-20) | 604.15(462.38-770.27) | 5.69(5.45-5.94) |
| Dominican Republic | 214(173-261) | 206.76(163.54-261.82) | 1,133(870-1,510) | 333.30(246.42-452.61) | 4.50(4.06-4.95) |
| Ecuador | 345(307-384) | 212.38(181.37-246.59) | 2,332(1,821-2,907) | 407.01(309.25-521.91) | 5.89(5.30-6.48) |
| Egypt | 562(461-713) | 119.44(93.09-155.62) | 3,370(2,726-4,070) | 305.73(235.79-386.58) | 5.97(5.83-6.12) |
| El Salvador | 114(100-131) | 119.34(98.21-144.48) | 825(650-1,012) | 345.51(262.36-447.10) | 7.43(6.98-7.87) |
| Equatorial Guinea | 3.9(3-5) | 105.12(77.27-139.34) | 25(18-32) | 222.36(156.48-311.18) | 3.97(3.89-4.05) |
| Eritrea | 13(10-16) | 106.14(81.09-139.61) | 80(63-100) | 170.15(125.70-223.43) | 2.05(1.96-2.14) |
| Estonia | 561(496-630) | 672.23(576.00-783.43) | 1,983(1,648-2,325) | 1,605.93(1,288.47-1,965.91) | 26.92(25.87-27.49) |
| Eswatini | 12(8.2-15) | 187.93(128.97-255.85) | 28(19-36) | 242.73(163.58-333.98) | 1.79(1.74-1.85) |
| Ethiopia | 803(559-963) | 252.60(176.42-309.73) | 3,445(2,947-4,062) | 306.28(252.17-369.82) | 1.73(1.65-1.80) |
| Fiji | 10(8.1-12) | 149.59(116.09-189.60) | 31(24-39) | 185.31(138.66-239.72) | 1.18(1.10-1.26) |
| Finland | 2,997(2,679-3,314) | 1,019.26(872.38-1,186.81) | 8,513(7,011-9,687) | 1,465.00(1,176.42-1,745.90) | 14.12(13.13-15.10) |
| France | 56,798(49,777-63,465) | 1,467.19(1,235.41-1,713.26) | 126,102(105,291-143,906) | 1,978.96(1,603.29-2,328.67) | 17.88(16.45-19.32) |
| Gabon | 30(19-41) | 190.64(122.11-274.27) | 59(45-74) | 256.10(184.96-336.65) | 2.21(2.15-2.27) |
| Gambia | 3.8(3.1-4.6) | 46.77(35.82-59.59) | 15(12-18) | 56.37(41.98-74.23) | 0.32(0.30-0.34) |
| Georgia | 422(373-479) | 195.77(166.51-231.51) | 724(643-809) | 342.95(289.96-399.47) | 4.93(4.06-5.80) |
| Germany | 100,579(88,767-112,447) | 1,746.89(1,486.81-2,039.99) | 154,067(129,662-177,047) | 1,669.80(1,362.25-1,970.67) | -1.54(-3.79-0.70) |
| Ghana | 122(98-150) | 93.50(70.79-120.69) | 549(435-685) | 148.10(110.39-197.78) | 1.75(1.70-1.79) |
| Greece | 8,189(7,257-9,172) | 1,371.91(1,166.33-1,599.68) | 17,669(15,093-19,829) | 1,482.73(1,239.87-1,736.52) | 4.02(2.20-5.83) |
| Greenland | 6.8(5.9-7.9) | 1,016.06(812.68-1,255.72) | 17(14-20) | 1,012.99(778.40-1,298.25) | 0.34(-0.59-1.26) |
| Grenada | 12(10-13) | 353.61(296.62-418.08) | 29(25-34) | 796.94(653.73-972.50) | 15.48(14.67-16.30) |
| Guam | 5.2(4.4-6.2) | 364.42(293.78-443.10) | 16(13-19) | 236.26(184.91-287.93) | -3.32(-5.07--1.57) |
| Guatemala | 74(67-84) | 97.34(85.04-112.64) | 683(583-797) | 194.15(161.63-231.62) | 3.21(2.78-3.64) |
| Guinea | 54(43-67) | 61.19(46.05-78.82) | 109(85-137) | 74.86(56.07-100.03) | 0.44(0.42-0.45) |
| Guinea-Bissau | 7.8(5.6-9.9) | 93.50(65.87-123.26) | 17(13-21) | 131.13(97.79-171.95) | 1.23(1.20-1.25) |
| Guyana | 23(20-26) | 223.68(188.87-260.59) | 53(41-66) | 324.10(252.20-407.34) | 4.16(3.18-5.14) |
| Haiti | 150(108-196) | 226.48(160.90-302.86) | 385(274-529) | 253.86(176.81-348.74) | 1.07(0.63-1.51) |
| Honduras | 45(37-56) | 79.46(61.89-101.70) | 284(212-371) | 156.34(111.34-213.85) | 2.59(2.49-2.68) |
| Hungary | 5,280(4,470-6,066) | 878.89(735.86-1,029.12) | 10,189(8,621-11,847) | 1,217.31(1,012.12-1,434.51) | 12.15(10.58-13.73) |
| Iceland | 154(134-175) | 1,334.99(1,112.56-1,588.49) | 404(335-469) | 1,737.76(1,410.04-2,085.10) | 12.93(9.35-16.52) |
| India | 4,537(3,804-5,342) | 47.71(39.37-57.50) | 24,542(21,956-27,233) | 73.51(64.90-82.48) | 0.91(0.84-0.98) |
| Indonesia | 2,878(2,298-3,395) | 144.06(112.72-176.30) | 12,883(10,355-15,449) | 255.74(202.78-310.66) | 3.64(3.57-3.71) |
| Iran (Islamic Republic of) | 935(790-1,088) | 240.87(197.89-291.97) | 9,952(8,217-11,139) | 462.81(379.87-535.33) | 7.01(6.77-7.25) |
| Iraq | 276(225-338) | 115.49(88.02-151.15) | 1,346(1,049-1,659) | 248.35(184.18-320.30) | 4.54(4.36-4.72) |
| Ireland | 2,454(2,191-2,724) | 1,495.08(1,252.97-1,735.93) | 6,659(5,629-7,560) | 2,077.89(1,671.53-2,475.24) | 18.79(17.20-20.38) |
| Israel | 2,368(2,049-2,708) | 1,229.86(1,021.36-1,468.52) | 7,361(5,901-8,658) | 1,510.35(1,193.30-1,821.61) | 8.65(6.46-10.84) |
| Italy | 49,731(44,410-55,533) | 1,308.84(1,128.74-1,516.82) | 128,766(110,534-142,092) | 1,851.04(1,548.18-2,116.49) | 17.93(17.18-18.68) |
| Jamaica | 342(298-381) | 469.78(389.56-550.66) | 864(687-1,090) | 801.56(611.48-1,036.11) | 11.31(10.02-12.60) |
| Japan | 104,250(94,242-113,477) | 1,715.99(1,526.58-1,905.82) | 434,854(362,207-478,819) | 2,308.47(1,893.95-2,621.35) | 17.69(16.94-18.43) |
| Jordan | 74(59-91) | 276.95(210.12-354.63) | 837(628-1,117) | 499.09(361.24-689.83) | 6.88(6.55-7.22) |
| Kazakhstan | 1,064(912-1,214) | 263.39(223.09-307.50) | 1,254(1,072-1,432) | 289.19(244.81-333.08) | 1.25(0.85-1.66) |
| Kenya | 136(111-166) | 68.19(54.73-85.58) | 550(452-656) | 116.92(95.57-140.88) | 1.56(1.50-1.63) |
| Kiribati | 0.81(0.64-1) | 114.22(86.07-150.86) | 1.7(1.4-2.1) | 130.44(100.74-168.32) | 0.54(0.52-0.55) |
| Kuwait | 35(30-39) | 305.75(253.14-362.69) | 454(369-545) | 818.15(642.97-1,034.17) | 17.70(14.20-21.20) |
| Kyrgyzstan | 168(142-196) | 172.06(142.28-204.05) | 173(143-212) | 174.27(141.87-215.11) | 0.00(-0.26-0.26) |
| Lao People's Democratic Republic | 65(44-85) | 147.04(98.89-199.21) | 226(170-286) | 210.25(152.03-275.68) | 2.08(2.05-2.10) |
| Latvia | 792(703-897) | 549.68(466.80-645.59) | 1,683(1,421-1,979) | 892.67(723.94-1,087.73) | 11.50(10.88-12.12) |
| Lebanon | 239(177-300) | 431.55(307.88-560.34) | 2,275(1,778-2,916) | 902.92(671.69-1,210.99) | 15.40(14.93-15.88) |
| Lesotho | 28(22-36) | 122.95(92.36-164.32) | 45(33-62) | 194.03(137.58-275.35) | 2.31(2.22-2.39) |
| Liberia | 25(20-31) | 81.54(62.66-105.45) | 51(35-73) | 113.01(74.12-169.20) | 0.98(0.93-1.03) |
| Libya | 211(160-270) | 413.55(298.87-557.12) | 866(644-1,138) | 658.57(478.05-915.87) | 8.11(7.45-8.77) |
| Lithuania | 1,032(926-1,147) | 583.53(503.66-681.84) | 2,611(2,196-3,100) | 960.80(787.81-1,163.27) | 12.18(11.51-12.86) |
| Luxembourg | 337(299-377) | 1,461.49(1,245.18-1,713.26) | 817(716-923) | 1,914.20(1,619.07-2,226.56) | 15.77(13.75-17.79) |
| Madagascar | 119(98-143) | 106.58(82.22-135.12) | 220(166-275) | 125.95(92.87-167.02) | 0.63(0.58-0.69) |
| Malawi | 43(36-52) | 58.45(45.92-73.64) | 113(91-145) | 72.33(55.11-95.63) | 0.47(0.44-0.50) |
| Malaysia | 741(623-875) | 288.45(225.91-364.51) | 4,533(3,695-5,420) | 565.90(441.85-716.93) | 7.89(6.38-9.39) |
| Maldives | 1.7(1.4-2.1) | 116.32(88.62-150.48) | 15(13-18) | 176.73(135.04-227.02) | 1.88(1.76-1.99) |
| Mali | 79(66-95) | 99.26(76.93-125.08) | 242(195-301) | 123.00(92.28-162.47) | 0.76(0.73-0.80) |
| Malta | 170(147-196) | 1,119.51(921.27-1,333.42) | 675(556-782) | 1,568.09(1,247.65-1,897.22) | 14.48(12.56-16.40) |
| Marshall Islands | 0.62(0.5-0.75) | 167.09(128.34-213.97) | 0.93(0.74-1.2) | 190.71(143.89-251.63) | 0.71(0.67-0.75) |
| Mauritania | 27(22-34) | 102.73(78.08-132.82) | 97(71-126) | 167.10(119.74-226.55) | 2.11(2.06-2.15) |
| Mauritius | 34(30-38) | 182.53(157.92-211.24) | 233(207-257) | 426.14(370.11-486.55) | 6.50(6.34-6.68) |
| Mexico | 2,269(2,119-2,415) | 185.57(170.79-201.43) | 14,124(12,716-15,731) | 345.83(307.41-386.97) | 5.18(4.97-5.39) |
| Micronesia (Federated States of) | 2.2(1.8-2.8) | 178.27(136.63-234.07) | 2.6(2-3.3) | 212.83(153.97-285.26) | 1.09(1.07-1.11) |
| Monaco | 70(53-86) | 2,010.39(1,452.51-2,621.31) | 145(115-172) | 3,141.68(2,362.74-3,985.97) | 37.90(36.84-38.96) |
| Mongolia | 31(25-38) | 98.46(77.46-123.20) | 76(61-93) | 151.76(120.35-189.34) | 1.57(1.46-1.67) |
| Montenegro | 133(115-155) | 603.34(493.86-742.74) | 307(260-358) | 939.79(752.30-1,136.27) | 11.15(9.96-12.34) |
| Morocco | 532(435-659) | 128.82(97.19-168.41) | 2,516(1,929-3,214) | 253.73(184.52-347.00) | 4.12(4.05-4.19) |
| Mozambique | 72(58-85) | 60.57(46.08-76.74) | 154(118-191) | 73.63(53.58-97.12) | 0.46(0.44-0.48) |
| Myanmar | 696(503-956) | 137.59(97.11-190.39) | 2,780(2,070-3,546) | 220.68(159.86-290.90) | 2.74(2.65-2.83) |
| Namibia | 11(8.5-13) | 84.74(65.54-108.59) | 38(29-46) | 115.88(86.86-147.60) | 1.01(0.96-1.05) |
| Nauru | 0.18(0.12-0.24) | 245.65(165.17-343.59) | 0.31(0.21-0.4) | 274.67(182.24-368.07) | 0.95(0.91-0.99) |
| Nepal | 77(59-101) | 40.35(29.20-54.91) | 424(323-552) | 66.41(48.18-91.58) | 0.86(0.84-0.87) |
| Netherlands | 28,294(25,053-31,176) | 3,427.95(2,940.73-3,950.36) | 58,769(50,756-66,662) | 3,966.58(3,310.82-4,594.06) | 15.73(8.86-22.59) |
| New Zealand | 3,353(2,898-3,817) | 2,205.06(1,840.72-2,616.94) | 9,984(8,372-11,560) | 2,927.66(2,362.10-3,492.54) | 22.21(19.58-24.84) |
| Nicaragua | 51(43-61) | 119.81(94.53-150.54) | 364(285-459) | 240.69(179.94-319.43) | 3.80(3.48-4.13) |
| Niger | 37(28-47) | 69.38(50.45-92.62) | 165(125-216) | 92.50(67.07-126.18) | 0.76(0.73-0.79) |
| Nigeria | 956(807-1,137) | 84.36(70.14-101.04) | 2,343(2,040-2,661) | 110.93(95.59-127.89) | 0.85(0.82-0.88) |
| Niue | 0.21(0.17-0.25) | 217.03(168.20-280.66) | 0.22(0.18-0.26) | 303.04(233.84-387.36) | 2.72(2.64-2.79) |
| North Macedonia | 262(224-307) | 481.66(391.19-590.04) | 778(639-945) | 781.08(641.98-945.95) | 10.06(9.66-10.46) |
| Northern Mariana Islands | 0.85(0.68-1.1) | 350.16(270.68-450.81) | 4.2(3.5-5) | 483.36(380.01-607.45) | 3.94(3.33-4.56) |
| Norway | 5,161(4,660-5,668) | 1,679.45(1,471.23-1,906.34) | 10,918(9,396-12,025) | 2,567.04(2,152.08-2,935.82) | 27.90(25.93-29.88) |
| Oman | 18(14-23) | 117.61(88.95-156.39) | 84(62-109) | 214.77(151.75-289.96) | 3.46(3.20-3.71) |
| Pakistan | 1,055(884-1,236) | 67.24(54.46-81.34) | 2,591(2,178-3,108) | 93.45(76.05-114.43) | 0.86(0.85-0.87) |
| Palau | 0.78(0.61-1) | 311.30(225.48-421.27) | 1.8(1.4-2.3) | 414.48(300.98-559.81) | 3.19(3.07-3.32) |
| Palestine | 110(89-135) | 458.27(348.59-592.38) | 383(320-460) | 659.89(521.68-838.71) | 5.73(5.08-6.38) |
| Panama | 156(136-176) | 320.16(270.82-375.00) | 1,159(900-1,403) | 727.34(555.96-908.41) | 13.75(13.23-14.27) |
| Papua New Guinea | 15(11-18) | 57.15(43.20-74.46) | 49(38-62) | 55.79(42.16-71.49) | -0.04(-0.05--0.03) |
| Paraguay | 107(89-126) | 152.97(120.22-190.98) | 649(500-823) | 359.25(263.04-484.24) | 6.85(6.56-7.13) |
| Peru | 889(757-1,039) | 245.25(196.10-304.72) | 7,239(5,446-9,152) | 627.62(449.96-832.66) | 12.55(11.80-13.30) |
| Philippines | 1,203(1,056-1,437) | 170.71(146.94-205.87) | 4,367(3,812-4,990) | 218.69(188.30-253.62) | 1.56(1.46-1.66) |
| Poland | 7,257(6,576-8,093) | 453.76(401.15-516.40) | 21,569(19,023-23,667) | 810.83(707.63-908.95) | 11.75(11.34-12.17) |
| Portugal | 4,836(4,237-5,471) | 923.97(777.88-1,096.42) | 17,078(14,555-19,188) | 1,462.43(1,221.04-1,711.10) | 18.24(17.36-19.12) |
| Puerto Rico | 1,029(908-1,170) | 741.80(619.05-875.14) | 4,862(3,940-5,883) | 1,480.74(1,143.36-1,861.40) | 22.20(20.58-23.82) |
| Qatar | 6.2(5.1-7.7) | 503.78(381.40-649.06) | 94(72-128) | 1,013.18(742.24-1,431.54) | 16.56(14.14-18.98) |
| Republic of Korea | 3,629(3,059-4,266) | 533.06(426.11-658.08) | 67,104(54,198-80,449) | 1,935.62(1,487.77-2,449.56) | 45.03(43.57-46.49) |
| Republic of Moldova | 562(497-634) | 411.82(346.93-487.30) | 1,261(1,079-1,466) | 626.91(523.78-739.44) | 5.70(4.70-6.69) |
| Romania | 2,891(2,482-3,369) | 295.33(242.39-360.89) | 14,565(12,097-17,583) | 961.00(786.62-1,184.58) | 21.58(20.98-22.18) |
| Russian Federation | 28,039(25,525-31,024) | 425.13(377.61-484.30) | 63,329(57,832-68,072) | 841.11(768.02-909.11) | 13.25(12.66-13.83) |
| Rwanda | 64(50-78) | 120.90(91.24-155.00) | 205(154-265) | 161.37(112.26-220.23) | 1.39(1.12-1.66) |
| Saint Kitts and Nevis | 5.9(5.3-6.7) | 387.09(336.67-444.46) | 13(11-15) | 832.79(690.35-981.98) | 14.13(13.10-15.16) |
| Saint Lucia | 9.9(8.7-11) | 342.85(297.06-391.36) | 45(37-55) | 538.71(432.23-662.57) | 6.12(5.52-6.71) |
| Saint Vincent and the Grenadines | 9.3(8.3-10) | 363.64(314.17-422.70) | 25(22-29) | 525.64(441.57-621.88) | 5.47(4.58-6.37) |
| Samoa | 3.7(3-4.5) | 182.20(141.31-232.23) | 8.8(7.1-11) | 221.65(171.16-282.55) | 1.28(1.23-1.34) |
| San Marino | 34(27-41) | 2,277.85(1,757.58-2,952.04) | 57(43-76) | 1,653.03(1,173.69-2,281.60) | -23.18(-27.85--18.50) |
| Sao Tome and Principe | 3.1(2.5-3.7) | 160.10(121.43-205.29) | 6.9(5.6-8.6) | 257.03(192.79-343.23) | 3.05(2.91-3.20) |
| Saudi Arabia | 258(205-317) | 190.11(143.99-249.41) | 1,184(977-1,440) | 479.43(371.21-622.69) | 9.44(9.26-9.62) |
| Senegal | 76(63-92) | 92.74(72.08-117.64) | 287(222-358) | 142.76(104.39-191.53) | 1.62(1.58-1.67) |
| Serbia | 1,475(1,232-1,776) | 653.28(524.74-806.85) | 4,612(3,855-5,504) | 667.73(531.93-830.02) | 0.71(0.02-1.39) |
| Seychelles | 6.2(5.2-7.3) | 299.22(238.11-379.26) | 19(16-22) | 583.62(463.60-729.02) | 8.03(6.94-9.11) |
| Sierra Leone | 46(36-56) | 74.52(56.05-97.73) | 99(75-128) | 100.43(72.45-135.65) | 0.84(0.81-0.87) |
| Singapore | 651(563-743) | 1,078.72(906.73-1,270.08) | 4,691(3,893-5,547) | 1,773.61(1,432.83-2,164.75) | 23.37(21.36-25.38) |
| Slovakia | 2,336(1,975-2,761) | 994.57(800.10-1,214.80) | 6,379(5,197-7,770) | 1,821.28(1,418.23-2,305.94) | 26.72(25.78-27.67) |
| Slovenia | 733(653-817) | 723.83(616.67-841.69) | 2,374(1,963-2,828) | 1,255.88(1,015.66-1,522.26) | 16.99(15.26-18.72) |
| Solomon Islands | 2.9(2.3-3.6) | 134.20(102.48-174.56) | 11(8.5-14) | 151.02(111.86-199.26) | 0.53(0.50-0.56) |
| Somalia | 42(31-59) | 109.81(78.17-154.86) | 104(72-145) | 129.28(87.71-182.94) | 0.65(0.62-0.68) |
| South Africa | 1,026(866-1,330) | 181.91(149.70-237.30) | 2,987(2,695-3,276) | 240.19(212.05-268.25) | 2.09(1.85-2.32) |
| South Sudan | 77(55-102) | 123.10(86.96-170.16) | 127(92-164) | 169.11(119.18-225.17) | 1.54(1.50-1.58) |
| Spain | 30,124(26,455-33,674) | 1,382.73(1,180.25-1,597.86) | 96,774(80,441-112,998) | 2,137.09(1,703.66-2,562.92) | 25.27(24.05-26.50) |
| Sri Lanka | 286(244-333) | 105.47(84.16-129.49) | 1,388(1,011-1,809) | 162.60(112.52-220.45) | 1.74(1.51-1.96) |
| Sudan | 261(199-340) | 110.18(80.20-148.98) | 884(638-1,232) | 180.22(125.59-255.62) | 2.29(2.24-2.34) |
| Suriname | 24(20-27) | 333.18(269.67-412.81) | 90(68-116) | 443.13(314.80-600.75) | 3.49(2.70-4.27) |
| Sweden | 9,791(8,577-11,075) | 1,395.59(1,172.51-1,649.62) | 18,981(15,855-22,170) | 1,809.84(1,468.30-2,187.14) | 14.40(12.90-15.89) |
| Switzerland | 6,257(5,469-7,077) | 1,336.27(1,125.65-1,571.62) | 12,957(10,432-15,132) | 1,551.36(1,236.86-1,858.36) | 9.88(7.88-11.88) |
| Syrian Arab Republic | 223(182-269) | 180.46(139.88-226.85) | 998(765-1,313) | 317.06(236.24-425.89) | 4.52(4.30-4.75) |
| Taiwan (Province of China) | 2,199(1,986-2,474) | 247.97(207.49-297.72) | 24,948(21,446-28,206) | 862.87(688.62-1,045.41) | 20.18(19.20-21.15) |
| Tajikistan | 103(85-119) | 122.09(99.31-147.72) | 84(62-103) | 79.45(57.72-100.98) | -1.52(-1.63--1.41) |
| Thailand | 2,276(1,853-2,748) | 260.90(201.35-334.83) | 20,708(16,521-25,896) | 555.21(413.20-727.61) | 9.59(9.38-9.81) |
| Timor-Leste | 5.2(4-6.4) | 120.81(88.87-157.42) | 41(32-52) | 165.88(125.20-220.77) | 1.43(1.37-1.49) |
| Togo | 22(18-27) | 80.50(61.92-105.69) | 91(67-122) | 121.09(84.11-167.30) | 1.31(1.27-1.35) |
| Tokelau | 0.08(0.066-0.096) | 186.15(144.11-239.00) | 0.13(0.1-0.17) | 235.18(174.93-309.10) | 1.62(1.54-1.70) |
| Tonga | 1.9(1.6-2.3) | 139.85(107.20-179.68) | 4.9(3.9-6.3) | 181.82(136.48-240.87) | 1.39(1.32-1.45) |
| Trinidad and Tobago | 126(113-140) | 456.69(397.73-522.68) | 437(344-544) | 675.94(517.26-850.45) | 7.48(6.65-8.31) |
| Tunisia | 377(312-456) | 284.37(217.49-366.70) | 1,718(1,300-2,256) | 427.85(305.97-590.23) | 4.61(4.44-4.77) |
| Türkiye | 3,546(2,960-4,234) | 387.17(297.63-491.54) | 23,277(18,698-28,590) | 804.13(608.75-1,035.76) | 14.47(13.87-15.07) |
| Turkmenistan | 51(44-60) | 97.05(81.84-114.89) | 85(69-105) | 92.13(73.97-114.97) | -0.05(-0.14-0.05) |
| Tuvalu | 0.2(0.16-0.25) | 165.41(125.94-213.97) | 0.57(0.46-0.71) | 208.26(158.40-269.32) | 1.35(1.29-1.40) |
| Uganda | 215(177-261) | 139.08(106.96-176.22) | 560(459-693) | 167.94(127.53-218.38) | 0.97(0.93-1.01) |
| Ukraine | 16,194(14,395-18,184) | 586.88(501.11-685.26) | 15,411(12,600-18,733) | 535.34(426.55-665.86) | -2.28(-3.15--1.41) |
| United Arab Emirates | 31(23-41) | 416.28(296.77-561.42) | 121(91-168) | 779.48(555.27-1,113.84) | 11.86(7.36-16.35) |
| United Kingdom | 62,040(57,266-66,695) | 1,566.36(1,420.92-1,722.59) | 108,965(97,304-115,900) | 1,884.63(1,680.27-2,024.92) | 10.05(9.22-10.88) |
| United Republic of Tanzania | 298(240-361) | 121.02(93.92-153.76) | 1,002(778-1,255) | 159.47(117.23-211.08) | 1.26(1.22-1.31) |
| United States of America | 273,106(243,987-294,416) | 2,072.93(1,826.47-2,285.02) | 366,053(320,593-394,333) | 1,601.95(1,389.26-1,737.11) | -14.71(-15.54--13.88) |
| United States Virgin Islands | 19(16-23) | 843.84(648.69-1,090.55) | 60(45-78) | 759.36(552.99-1,027.56) | -2.73(-4.03--1.43) |
| Uruguay | 1,229(1,092-1,369) | 809.12(690.48-936.09) | 3,269(2,816-3,722) | 1,326.01(1,099.45-1,559.13) | 16.64(15.31-17.98) |
| Uzbekistan | 377(317-441) | 99.49(82.65-118.44) | 428(352-508) | 72.17(58.99-86.65) | -0.83(-0.96--0.71) |
| Vanuatu | 1.7(1.3-2.2) | 151.68(113.12-202.94) | 5.8(4.5-7.4) | 160.32(121.37-212.19) | 0.26(0.24-0.28) |
| Venezuela (Bolivarian Republic of) | 668(592-749) | 234.85(202.25-270.05) | 3,986(3,073-5,090) | 442.55(331.14-573.47) | 6.70(5.77-7.64) |
| Viet Nam | 1,513(1,252-1,808) | 126.75(99.11-160.81) | 9,127(7,266-10,970) | 342.01(257.81-432.36) | 7.09(6.94-7.23) |
| Yemen | 111(86-140) | 114.30(84.48-152.20) | 526(378-710) | 161.18(111.96-228.61) | 1.55(1.49-1.61) |
| Zambia | 79(65-95) | 126.68(97.17-162.39) | 293(213-409) | 202.45(141.80-287.26) | 2.46(2.35-2.58) |
| Zimbabwe | 176(144-216) | 199.75(153.21-257.79) | 286(233-349) | 218.58(167.96-277.39) | 0.81(0.71-0.92) |

**Supplementary Table 3** incidence of 204 countries and regions

| **Location** | **Cases (n),1990** | **Incidence(per 100,000 population),1990** | **Cases (n),2021** | **Incidence(per 100,000 population),2021** | **AAPC,1990–2021** |
| --- | --- | --- | --- | --- | --- |
| Afghanistan | 118(66-172) | 75.56(42.04-113.43) | 200(124-277) | 89.65(53.40-129.85) | 0.45(0.43-0.46) |
| Albania | 50(41-60) | 92.67(72.35-117.28) | 195(152-251) | 123.30(90.59-165.75) | 1.10(0.97-1.23) |
| Algeria | 157(129-191) | 69.31(51.60-91.76) | 611(472-767) | 72.47(51.20-99.18) | 0.13(0.08-0.17) |
| American Samoa | 0.64(0.52-0.76) | 152.62(116.82-196.05) | 2(1.6-2.4) | 169.54(128.79-218.97) | 0.69(0.56-0.81) |
| Andorra | 9(6.4-13) | 475.13(319.00-675.82) | 26(19-35) | 443.25(295.01-627.28) | -0.35(-1.22-0.51) |
| Angola | 36(26-46) | 60.52(41.15-85.49) | 152(111-204) | 78.28(52.59-114.18) | 0.59(0.57-0.61) |
| Antigua and Barbuda | 4.4(4-4.9) | 190.40(164.27-218.69) | 9.7(8.4-11) | 307.41(260.64-357.92) | 4.13(3.61-4.65) |
| Argentina | 2,688(2,370-2,986) | 254.84(214.06-296.34) | 5,694(4,870-6,479) | 259.60(210.69-308.39) | 0.42(0.17-0.67) |
| Armenia | 84(74-94) | 104.97(91.59-118.07) | 229(197-260) | 161.31(136.86-185.02) | 1.71(1.34-2.08) |
| Australia | 3,056(2,658-3,399) | 425.37(361.21-484.91) | 8,081(6,618-9,415) | 417.39(334.92-499.10) | -0.49(-0.90--0.08) |
| Austria | 2,142(1,895-2,328) | 400.95(343.94-456.79) | 2,301(1,884-2,698) | 276.87(224.09-329.56) | -4.84(-5.02--2.97) |
| Azerbaijan | 83(71-96) | 56.75(45.49-69.39) | 130(98-163) | 61.65(43.86-79.90) | 0.17(0.11-0.22) |
| Bahamas | 7.9(7.1-8.8) | 169.15(144.87-195.60) | 32(26-39) | 287.37(228.37-352.80) | 3.97(3.51-4.43) |
| Bahrain | 4(3.3-4.8) | 159.90(121.40-204.39) | 19(15-24) | 209.57(153.56-282.73) | 1.71(1.35-2.06) |
| Bangladesh | 373(282-477) | 29.19(20.68-40.28) | 1,265(962-1,711) | 32.33(22.89-45.53) | 0.16(0.12-0.20) |
| Barbados | 38(34-43) | 282.53(241.56-327.22) | 94(76-114) | 493.15(385.20-611.71) | 7.03(6.54-7.53) |
| Belarus | 766(669-872) | 157.18(134.41-182.53) | 1,408(1,104-1,735) | 256.59(197.59-321.89) | 2.81(2.24-3.38) |
| Belgium | 3,154(2,719-3,485) | 485.23(399.12-570.68) | 3,862(3,153-4,510) | 360.02(280.93-442.01) | -3.80(-4.10--3.49) |
| Belize | 2.7(2.4-3.1) | 84.33(72.30-96.32) | 11(9.1-12) | 133.63(111.38-156.38) | 1.45(1.20-1.71) |
| Benin | 27(22-33) | 47.73(36.01-61.91) | 79(62-97) | 64.58(46.82-87.67) | 0.53(0.51-0.55) |
| Bermuda | 11(10-13) | 552.34(467.57-651.88) | 39(31-48) | 659.84(514.26-840.91) | 4.36(3.64-5.09) |
| Bhutan | 1.3(0.76-1.7) | 30.12(17.64-43.15) | 7.8(5.3-10) | 41.60(26.67-58.66) | 0.37(0.37-0.38) |
| Bolivia (Plurinational State of) | 103(68-141) | 126.91(79.61-181.83) | 415(272-558) | 168.21(107.73-239.80) | 1.33(1.28-1.38) |
| Bosnia and Herzegovina | 158(134-182) | 139.21(113.58-166.39) | 606(484-747) | 262.72(204.62-327.18) | 4.03(3.74-4.33) |
| Botswana | 9.7(7.2-12) | 96.15(66.78-132.45) | 34(27-43) | 112.55(81.10-156.23) | 0.43(0.30-0.56) |
| Brazil | 2,333(2,105-2,481) | 102.62(90.95-111.07) | 10,725(9,224-11,683) | 129.36(109.75-143.33) | 0.85(0.75-0.95) |
| Brunei Darussalam | 7.4(5.8-9.2) | 287.98(211.50-382.42) | 19(15-24) | 284.53(216.03-366.47) | -0.40(-0.79--0.02) |
| Bulgaria | 810(701-934) | 209.51(179.32-242.15) | 2,034(1,669-2,457) | 331.70(268.75-404.41) | 3.83(3.06-4.60) |
| Burkina Faso | 50(39-61) | 51.13(37.44-67.97) | 151(118-193) | 69.40(49.81-93.41) | 0.59(0.56-0.63) |
| Burundi | 40(31-50) | 69.22(50.49-92.40) | 69(51-91) | 78.14(53.34-109.78) | 0.28(0.26-0.30) |
| Cabo Verde | 4.2(3.5-5) | 43.85(33.07-57.09) | 19(14-23) | 140.87(97.29-186.60) | 3.25(3.06-3.45) |
| Cambodia | 83(60-110) | 88.18(60.66-122.01) | 360(271-459) | 131.37(93.45-179.01) | 1.41(1.39-1.43) |
| Cameroon | 62(50-76) | 65.09(48.78-85.27) | 214(161-285) | 82.84(57.36-116.48) | 0.56(0.53-0.59) |
| Canada | 5,136(4,523-5,725) | 422.56(358.56-492.79) | 12,747(10,805-14,526) | 422.85(338.40-503.47) | -0.18(-0.70-0.33) |
| Central African Republic | 10(7.8-14) | 68.54(46.53-100.15) | 20(14-28) | 68.78(44.54-103.02) | 0.02(0.01-0.04) |
| Chad | 32(25-41) | 40.29(29.18-55.41) | 79(61-100) | 63.09(45.02-85.08) | 0.75(0.74-0.76) |
| Chile | 492(437-536) | 158.87(135.48-184.36) | 2,187(1,863-2,469) | 227.32(181.48-271.67) | 2.16(1.93-2.39) |
| China | 26,526(23,024-29,949) | 153.34(131.30-174.88) | 168,546(137,582-196,316) | 256.94(207.30-304.23) | 3.39(3.25-3.52) |
| Colombia | 551(486-621) | 115.31(99.34-132.16) | 3,403(2,752-4,188) | 175.30(137.22-216.30) | 1.91(1.77-2.05) |
| Comoros | 2.7(2-3.5) | 71.95(50.51-98.31) | 12(8.7-16) | 100.06(66.96-141.55) | 0.89(0.87-0.90) |
| Congo | 16(12-21) | 86.16(59.91-119.00) | 44(35-55) | 93.43(67.70-127.14) | 0.25(0.22-0.29) |
| Cook Islands | 0.27(0.22-0.32) | 87.75(64.48-113.72) | 0.79(0.61-0.99) | 84.06(60.16-114.63) | -0.09(-0.13--0.06) |
| Costa Rica | 85(75-94) | 147.78(126.76-171.21) | 545(458-636) | 286.72(232.34-344.81) | 4.34(3.44-5.23) |
| C么te d'Ivoire | 24(20-29) | 38.39(28.64-50.55) | 88(71-113) | 41.26(30.08-56.12) | 0.10(0.07-0.12) |
| Croatia | 711(612-813) | 393.36(332.74-456.96) | 1,806(1,472-2,191) | 464.19(369.26-565.26) | 1.82(0.64-2.99) |
| Cuba | 1,045(938-1,157) | 280.28(237.18-324.87) | 3,432(2,898-4,046) | 438.82(345.86-550.00) | 5.09(4.76-5.41) |
| Cyprus | 86(65-106) | 416.71(283.08-548.90) | 305(246-371) | 397.97(292.50-525.18) | -1.01(-1.43--0.59) |
| Czechia | 2,307(2,072-2,590) | 412.45(354.48-473.51) | 3,205(2,690-3,786) | 348.87(279.22-426.55) | -1.99(-2.30--1.68) |
| Democratic People's Republic of Korea | 327(243-449) | 94.03(66.13-132.53) | 1,000(648-1,485) | 89.72(55.82-140.00) | -0.16(-0.18--0.14) |
| Democratic Republic of the Congo | 127(95-172) | 56.01(38.97-83.10) | 375(254-583) | 59.40(36.32-99.30) | 0.10(0.08-0.12) |
| Denmark | 1,230(1,087-1,344) | 343.22(294.78-386.81) | 2,484(2,094-2,820) | 463.81(377.52-548.00) | 4.18(3.47-4.89) |
| Djibouti | 1.5(1.1-2) | 78.60(54.35-112.27) | 12(8.6-15) | 126.25(87.50-176.36) | 1.55(1.53-1.57) |
| Dominica | 4.1(3.3-5) | 185.63(142.47-240.86) | 6.4(5.2-7.8) | 241.19(183.02-311.73) | 1.74(1.63-1.85) |
| Dominican Republic | 94(73-115) | 98.75(75.57-127.60) | 436(330-584) | 128.49(92.49-179.85) | 0.80(0.62-0.97) |
| Ecuador | 134(119-149) | 86.30(74.10-99.42) | 675(530-833) | 122.60(94.28-155.02) | 0.99(0.78-1.19) |
| Egypt | 204(170-267) | 45.71(34.93-61.99) | 1,035(821-1,246) | 99.22(74.96-126.23) | 1.73(1.66-1.81) |
| El Salvador | 50(43-57) | 52.27(42.17-63.37) | 265(208-327) | 108.33(82.13-139.15) | 1.83(1.71-1.96) |
| Equatorial Guinea | 2.3(1.7-2.9) | 63.51(43.45-89.52) | 11(8.1-15) | 110.25(73.48-157.97) | 1.55(1.50-1.60) |
| Eritrea | 7.6(5.8-10) | 67.85(47.82-93.67) | 46(35-58) | 106.91(73.77-146.47) | 1.26(1.25-1.28) |
| Estonia | 176(159-193) | 216.80(186.60-248.73) | 490(404-579) | 387.79(308.33-470.23) | 5.00(4.56-5.44) |
| Eswatini | 6.4(4.2-8.5) | 108.99(70.05-155.52) | 15(9.4-19) | 138.21(85.86-196.91) | 0.99(0.92-1.07) |
| Ethiopia | 516(338-624) | 176.99(116.26-221.34) | 1,940(1,635-2,314) | 182.67(145.91-224.77) | 0.24(0.20-0.29) |
| Fiji | 4.9(3.8-6.2) | 77.34(56.47-103.34) | 15(12-20) | 101.00(71.02-135.86) | 0.75(0.68-0.82) |
| Finland | 767(673-838) | 265.94(226.37-305.73) | 1,763(1,400-2,032) | 298.21(231.95-359.51) | 0.86(0.72-0.99) |
| France | 15,602(13,775-17,342) | 413.18(347.42-480.42) | 26,848(21,802-31,395) | 396.58(312.28-476.67) | -1.86(-2.03--1.04) |
| Gabon | 17(10-24) | 112.35(65.61-171.87) | 29(22-37) | 133.89(92.93-181.64) | 0.73(0.68-0.78) |
| Gambia | 1.9(1.6-2.4) | 25.32(18.67-33.46) | 7.7(6-9.8) | 30.72(21.89-42.23) | 0.18(0.17-0.19) |
| Georgia | 161(143-179) | 76.28(65.18-88.51) | 282(246-317) | 129.08(108.51-152.31) | 1.79(1.35-2.23) |
| Germany | 27,129(23,526-29,952) | 483.16(407.94-561.50) | 34,798(28,530-40,717) | 367.81(291.59-440.42) | -3.74(-4.26--3.23) |
| Ghana | 66(52-83) | 53.53(39.43-71.80) | 280(221-349) | 80.90(57.26-111.85) | 0.89(0.87-0.91) |
| Greece | 1,971(1,757-2,178) | 342.62(292.31-390.63) | 4,108(3,449-4,646) | 330.22(271.49-387.01) | -0.37(-0.86-0.12) |
| Greenland | 2.9(2.5-3.4) | 449.12(351.50-571.06) | 5.2(4.1-6.5) | 335.07(245.13-447.21) | -3.27(-3.68--2.86) |
| Grenada | 5.1(4.4-5.9) | 152.79(128.41-181.13) | 10(8.5-12) | 297.94(244.12-361.65) | 5.26(4.79-5.74) |
| Guam | 2.3(1.9-2.7) | 179.17(138.73-220.16) | 5.4(4.1-6.6) | 76.99(55.99-97.50) | -3.61(-4.45--2.78) |
| Guatemala | 39(35-43) | 55.54(48.94-62.62) | 278(237-324) | 82.48(68.61-97.80) | 0.84(0.60-1.08) |
| Guinea | 31(24-39) | 36.32(25.90-48.58) | 61(47-79) | 43.56(31.29-60.12) | 0.24(0.23-0.25) |
| Guinea-Bissau | 4.7(3.3-6.1) | 59.73(39.62-81.42) | 9.7(7.4-12) | 82.45(58.37-112.90) | 0.76(0.74-0.79) |
| Guyana | 12(10-13) | 117.59(99.28-137.64) | 24(18-29) | 150.73(115.74-191.12) | 0.99(0.70-1.29) |
| Haiti | 87(60-114) | 139.47(94.47-192.00) | 206(145-287) | 143.58(96.91-204.39) | 0.17(0.14-0.19) |
| Honduras | 20(16-25) | 36.94(27.59-48.72) | 122(89-159) | 71.08(49.10-98.28) | 1.19(1.13-1.25) |
| Hungary | 2,045(1,732-2,346) | 361.63(301.80-420.71) | 2,870(2,359-3,443) | 343.73(279.15-412.53) | -0.19(-0.52-0.14) |
| Iceland | 36(31-40) | 307.36(253.76-360.16) | 80(64-96) | 336.97(263.46-412.84) | 0.92(0.13-1.70) |
| India | 2,309(1,878-2,730) | 25.52(20.46-30.49) | 10,922(9,661-12,302) | 34.65(30.19-39.78) | 0.29(0.21-0.38) |
| Indonesia | 1,347(996-1,626) | 68.92(50.95-85.22) | 5,806(4,575-7,055) | 123.63(95.18-152.71) | 1.77(1.76-1.79) |
| Iran (Islamic Republic of) | 279(235-322) | 73.61(59.86-87.08) | 2,309(1,955-2,594) | 107.75(88.51-125.02) | 1.04(0.99-1.10) |
| Iraq | 91(71-115) | 37.92(27.44-50.82) | 378(292-464) | 73.57(52.81-96.56) | 1.21(1.14-1.29) |
| Ireland | 678(608-745) | 432.85(366.28-499.98) | 1,315(1,066-1,507) | 410.39(317.69-496.09) | -0.75(-1.30--0.19) |
| Israel | 661(561-757) | 363.81(298.76-427.72) | 1,688(1,302-2,015) | 338.17(256.38-413.10) | -0.83(-1.22--0.44) |
| Italy | 12,758(11,270-13,725) | 344.95(296.62-380.36) | 26,967(21,823-30,209) | 375.50(301.61-431.97) | 1.18(0.96-1.41) |
| Jamaica | 124(108-139) | 172.69(143.51-201.52) | 275(218-349) | 246.12(186.93-316.75) | 2.72(2.25-3.18) |
| Japan | 22,350(19,900-23,775) | 379.07(330.77-409.10) | 87,720(69,624-98,554) | 438.77(347.67-501.31) | 1.61(1.42-1.80) |
| Jordan | 25(20-31) | 95.06(69.81-123.52) | 192(140-265) | 121.25(83.86-170.25) | 0.87(0.70-1.05) |
| Kazakhstan | 447(382-513) | 112.60(95.55-129.50) | 451(378-526) | 103.36(85.61-120.69) | -0.59(-1.12--0.07) |
| Kenya | 61(49-79) | 32.19(25.31-41.83) | 276(223-337) | 63.18(49.94-78.00) | 1.01(0.99-1.03) |
| Kiribati | 0.45(0.35-0.61) | 67.71(47.83-93.85) | 0.98(0.78-1.2) | 79.84(58.52-107.54) | 0.40(0.39-0.41) |
| Kuwait | 8.6(7.2-9.6) | 76.88(62.27-90.92) | 95(76-116) | 164.40(124.85-210.06) | 3.13(2.26-3.99) |
| Kyrgyzstan | 70(58-81) | 72.65(60.59-84.93) | 66(52-82) | 64.62(51.00-81.43) | -0.18(-0.29--0.08) |
| Lao People's Democratic Republic | 37(22-49) | 88.89(54.17-127.15) | 116(86-149) | 113.54(77.97-154.76) | 0.80(0.78-0.81) |
| Latvia | 265(236-296) | 187.06(159.18-216.99) | 482(394-575) | 253.28(201.45-309.95) | 2.21(1.96-2.46) |
| Lebanon | 83(58-105) | 152.96(104.66-199.35) | 504(386-660) | 198.71(143.93-272.49) | 1.40(1.28-1.52) |
| Lesotho | 15(11-20) | 67.03(46.45-93.96) | 26(19-36) | 119.41(79.24-178.04) | 1.71(1.62-1.81) |
| Liberia | 14(12-18) | 51.19(37.91-67.95) | 27(18-40) | 62.87(39.00-96.76) | 0.36(0.34-0.38) |
| Libya | 71(52-94) | 138.61(97.85-191.31) | 218(159-291) | 168.35(117.21-236.70) | 0.94(0.75-1.14) |
| Lithuania | 324(293-356) | 185.64(160.50-213.71) | 744(611-895) | 270.08(217.32-329.80) | 2.48(2.28-2.68) |
| Luxembourg | 96(86-106) | 434.80(377.81-493.68) | 174(148-197) | 395.56(326.31-463.76) | -1.07(-1.88--0.26) |
| Madagascar | 67(54-79) | 61.75(45.85-80.76) | 120(87-153) | 74.21(51.55-102.22) | 0.42(0.39-0.45) |
| Malawi | 24(19-28) | 33.32(24.89-43.57) | 59(47-77) | 40.42(29.33-56.04) | 0.24(0.22-0.26) |
| Malaysia | 364(297-435) | 142.22(106.34-185.28) | 1,708(1,388-2,019) | 223.59(170.03-291.83) | 2.16(1.53-2.79) |
| Maldives | 0.84(0.64-1.1) | 59.60(42.55-81.18) | 5.8(4.6-7) | 65.98(48.61-86.08) | 0.18(0.13-0.24) |
| Mali | 46(38-56) | 61.31(45.65-79.70) | 130(103-163) | 70.24(50.53-95.13) | 0.31(0.29-0.33) |
| Malta | 46(40-53) | 312.09(257.86-370.47) | 144(115-171) | 335.53(260.44-408.76) | 0.73(0.25-1.20) |
| Marshall Islands | 0.34(0.27-0.42) | 98.40(71.98-130.97) | 0.48(0.37-0.62) | 107.85(76.79-146.08) | 0.26(0.22-0.31) |
| Mauritania | 16(12-19) | 62.07(45.35-82.98) | 49(35-64) | 87.62(60.51-122.95) | 0.83(0.81-0.86) |
| Mauritius | 14(13-16) | 81.47(70.65-92.71) | 85(75-93) | 157.78(134.32-178.10) | 2.22(1.99-2.46) |
| Mexico | 982(926-1,030) | 85.24(79.41-89.98) | 4,673(4,167-5,185) | 116.62(103.49-130.51) | 0.99(0.85-1.13) |
| Micronesia (Federated States of) | 1.3(1-1.6) | 108.91(79.79-148.73) | 1.4(1-1.8) | 118.78(80.33-165.69) | 0.32(0.31-0.33) |
| Monaco | 17(12-20) | 480.36(337.10-635.17) | 31(24-38) | 674.79(495.51-889.99) | 6.25(5.99-6.52) |
| Mongolia | 15(11-19) | 47.43(35.66-61.08) | 35(27-43) | 70.03(53.30-89.79) | 0.60(0.52-0.68) |
| Montenegro | 39(33-45) | 179.33(145.23-221.22) | 94(78-111) | 297.15(229.51-364.65) | 4.05(3.47-4.63) |
| Morocco | 204(164-253) | 50.71(36.42-69.25) | 824(612-1,064) | 86.94(61.31-120.32) | 1.16(1.15-1.17) |
| Mozambique | 40(32-48) | 36.16(26.57-47.41) | 91(68-115) | 47.32(32.61-65.72) | 0.39(0.37-0.41) |
| Myanmar | 381(263-545) | 78.44(51.28-115.43) | 1,280(927-1,664) | 104.82(71.16-143.52) | 0.86(0.84-0.87) |
| Namibia | 5.4(4.2-6.8) | 45.57(33.41-60.47) | 18(14-23) | 58.44(42.07-77.81) | 0.44(0.42-0.47) |
| Nauru | 0.099(0.065-0.14) | 151.12(94.82-222.40) | 0.15(0.099-0.2) | 151.01(92.34-208.68) | 0.01(-0.01-0.02) |
| Nepal | 49(37-64) | 27.20(18.77-37.92) | 212(157-282) | 35.82(25.08-50.20) | 0.28(0.27-0.28) |
| Netherlands | 5,680(5,006-6,329) | 697.05(587.69-803.27) | 10,513(8,839-12,090) | 707.21(573.19-833.05) | -0.46(-1.09-0.16) |
| New Zealand | 782(670-900) | 528.37(436.42-624.95) | 1,989(1,625-2,372) | 580.13(460.55-701.48) | 1.39(0.76-2.03) |
| Nicaragua | 21(17-25) | 49.32(37.91-63.00) | 112(88-139) | 76.30(56.12-101.67) | 0.92(0.83-1.01) |
| Niger | 21(16-28) | 42.84(29.15-59.76) | 92(69-122) | 56.23(39.09-79.32) | 0.42(0.40-0.44) |
| Nigeria | 548(451-655) | 50.46(41.18-60.50) | 1,317(1,141-1,496) | 65.26(55.52-75.93) | 0.47(0.45-0.49) |
| Niue | 0.11(0.09-0.13) | 112.82(83.12-150.62) | 0.099(0.079-0.12) | 138.36(102.71-181.56) | 0.81(0.78-0.85) |
| North Macedonia | 95(80-115) | 176.74(143.78-220.46) | 270(218-327) | 288.85(229.25-353.77) | 3.90(3.54-4.26) |
| Northern Mariana Islands | 0.37(0.29-0.46) | 170.14(125.97-223.70) | 1.6(1.3-1.9) | 195.44(147.84-252.53) | 0.85(0.75-0.98) |
| Norway | 1,283(1,137-1,377) | 420.89(369.39-461.83) | 2,278(1,901-2,523) | 525.90(431.46-602.49) | 3.25(2.67-3.83) |
| Oman | 5.8(4.3-7.5) | 37.60(26.32-51.49) | 20(14-27) | 56.19(37.35-78.24) | 0.62(0.50-0.74) |
| Pakistan | 602(481-705) | 40.58(31.33-50.48) | 1,446(1,180-1,774) | 55.23(43.38-69.75) | 0.48(0.47-0.49) |
| Palau | 0.38(0.28-0.5) | 167.56(112.88-238.91) | 0.73(0.55-0.95) | 184.91(128.43-257.45) | 0.53(0.46-0.59) |
| Palestine | 44(35-54) | 194.26(140.88-256.25) | 110(91-131) | 202.06(154.64-262.70) | -0.03(-0.19-0.13) |
| Panama | 55(49-62) | 115.88(97.99-132.03) | 326(249-391) | 202.08(152.34-247.80) | 2.97(2.76-3.19) |
| Papua New Guinea | 7(5.1-9.3) | 29.22(20.57-40.55) | 24(18-31) | 29.57(20.99-40.08) | 0.01(0.00-0.02) |
| Paraguay | 47(38-55) | 68.40(52.04-86.50) | 237(182-299) | 132.44(95.13-179.27) | 2.04(1.88-2.21) |
| Peru | 319(270-380) | 88.60(69.74-110.44) | 1,609(1,196-2,062) | 137.83(97.56-183.89) | 1.65(1.41-1.89) |
| Philippines | 590(521-716) | 91.42(79.08-113.60) | 2,145(1,850-2,458) | 110.54(93.66-128.80) | 0.63(0.56-0.71) |
| Poland | 3,329(3,105-3,499) | 212.53(196.14-225.45) | 8,743(7,615-9,555) | 318.37(275.99-351.42) | 3.47(3.30-3.65) |
| Portugal | 1,603(1,435-1,765) | 326.40(278.52-377.76) | 4,009(3,255-4,554) | 334.01(266.14-396.90) | 0.33(0.01-0.65) |
| Puerto Rico | 324(287-366) | 247.59(209.64-287.75) | 1,089(865-1,321) | 323.79(246.93-408.28) | 2.42(1.86-2.97) |
| Qatar | 2.2(1.8-2.8) | 190.87(139.15-254.01) | 21(16-29) | 244.10(171.38-349.20) | 1.68(0.94-2.42) |
| Republic of Korea | 1,104(937-1,256) | 171.07(135.22-210.68) | 13,556(10,561-16,525) | 395.87(290.43-515.58) | 7.11(6.64-7.58) |
| Republic of Moldova | 205(183-226) | 158.59(134.90-183.44) | 362(306-425) | 177.98(146.32-212.35) | 0.55(0.23-0.87) |
| Romania | 957(810-1,124) | 100.94(83.99-119.78) | 4,306(3,484-5,244) | 279.96(225.90-345.44) | 5.85(5.60-6.10) |
| Russian Federation | 10,396(9,808-10,866) | 161.41(150.11-169.87) | 23,385(21,045-25,257) | 295.47(265.48-320.67) | 4.38(4.01-4.75) |
| Rwanda | 39(30-48) | 78.93(57.18-105.07) | 115(82-151) | 96.29(63.74-136.31) | 0.53(0.49-0.56) |
| Saint Kitts and Nevis | 2.9(2.6-3.2) | 208.11(183.79-235.19) | 4.4(3.9-5) | 299.30(250.78-349.85) | 2.98(2.58-3.38) |
| Saint Lucia | 4.5(4-5) | 170.42(149.96-191.67) | 16(13-19) | 191.94(155.13-234.57) | 0.56(0.25-0.87) |
| Saint Vincent and the Grenadines | 4(3.6-4.4) | 165.21(143.36-189.28) | 9.7(8.5-11) | 208.99(178.30-242.33) | 1.77(1.42-2.13) |
| Samoa | 1.8(1.5-2.3) | 93.43(68.76-124.41) | 3.7(3-4.6) | 96.96(71.68-128.31) | 0.14(0.11-0.16) |
| San Marino | 8(6.3-9.9) | 545.63(409.23-704.29) | 11(7.7-15) | 308.71(204.05-440.40) | -8.41(-9.46--7.37) |
| Sao Tome and Principe | 1.7(1.4-2.1) | 92.72(68.87-121.51) | 3.4(2.7-4.3) | 132.38(96.50-180.20) | 1.26(1.18-1.34) |
| Saudi Arabia | 74(56-96) | 56.75(40.16-78.86) | 247(201-303) | 104.65(77.90-139.38) | 1.55(1.52-1.58) |
| Senegal | 42(34-52) | 54.06(40.48-70.48) | 152(113-192) | 79.62(56.46-109.44) | 0.83(0.81-0.85) |
| Serbia | 710(590-878) | 307.33(244.56-390.44) | 1,674(1,377-1,995) | 247.21(191.77-315.10) | -1.76(-2.09--1.43) |
| Seychelles | 3(2.6-3.6) | 148.07(112.44-192.97) | 7.6(6.3-8.9) | 238.05(183.05-306.40) | 2.49(1.76-3.22) |
| Sierra Leone | 27(20-34) | 45.23(32.38-61.11) | 55(41-71) | 58.83(41.04-81.51) | 0.44(0.42-0.46) |
| Singapore | 181(157-207) | 308.20(259.97-359.35) | 929(752-1,109) | 346.30(272.89-429.87) | 1.24(0.76-1.72) |
| Slovakia | 758(634-893) | 330.51(261.51-406.31) | 1,575(1,239-1,934) | 453.52(341.61-584.11) | 3.83(3.47-4.19) |
| Slovenia | 263(235-291) | 264.70(225.64-308.35) | 638(509-776) | 326.19(257.00-402.90) | 2.30(1.77-2.82) |
| Solomon Islands | 1.6(1.2-2) | 79.55(56.46-108.74) | 5.7(4.4-7.4) | 86.56(60.79-119.01) | 0.23(0.21-0.24) |
| Somalia | 25(17-36) | 67.93(44.02-102.66) | 59(38-86) | 79.36(48.79-120.00) | 0.38(0.36-0.40) |
| South Africa | 511(427-678) | 92.11(75.29-123.45) | 1,459(1,305-1,602) | 123.04(107.07-138.75) | 1.04(0.96-1.12) |
| South Sudan | 44(31-62) | 75.40(49.56-109.60) | 74(51-98) | 103.28(68.56-143.88) | 0.95(0.93-0.97) |
| Spain | 7,456(6,426-8,281) | 351.85(297.94-402.87) | 19,748(15,825-23,243) | 420.05(324.99-508.66) | 2.51(2.23-2.79) |
| Sri Lanka | 126(108-150) | 49.66(38.27-63.68) | 437(304-584) | 53.78(35.26-75.75) | 0.08(-0.01-0.18) |
| Sudan | 110(80-151) | 48.78(32.61-70.69) | 308(216-430) | 65.64(43.50-95.93) | 0.54(0.54-0.55) |
| Suriname | 11(9.3-12) | 151.12(119.44-190.34) | 35(26-46) | 176.46(121.81-244.92) | 0.67(0.23-1.11) |
| Sweden | 2,375(2,051-2,656) | 342.58(285.89-398.84) | 4,021(3,233-4,764) | 382.32(299.69-468.72) | 1.66(1.33-1.98) |
| Switzerland | 1,330(1,140-1,494) | 285.76(238.46-333.05) | 2,409(1,859-2,876) | 282.59(216.24-344.88) | 0.50(-0.01-1.02) |
| Syrian Arab Republic | 74(59-90) | 60.97(46.40-77.54) | 253(192-341) | 86.18(62.63-116.76) | 0.71(0.64-0.77) |
| Taiwan (Province of China) | 702(637-770) | 99.37(82.99-116.13) | 6,296(5,268-7,310) | 253.14(196.02-310.30) | 4.78(4.42-5.14) |
| Tajikistan | 44(36-53) | 53.14(41.86-65.63) | 40(25-52) | 37.47(23.54-50.32) | -0.63(-0.71--0.55) |
| Thailand | 1,054(834-1,281) | 125.86(93.68-165.16) | 6,613(5,140-8,294) | 175.41(125.22-233.61) | 1.48(1.36-1.60) |
| Timor-Leste | 2.9(2.1-3.6) | 66.89(45.83-92.17) | 20(15-26) | 86.73(61.95-120.42) | 0.63(0.62-0.65) |
| Togo | 12(9.6-16) | 46.59(34.04-62.75) | 48(34-64) | 68.94(46.30-98.59) | 0.73(0.70-0.75) |
| Tokelau | 0.043(0.035-0.052) | 103.76(77.36-138.43) | 0.06(0.047-0.076) | 109.67(77.87-148.22) | 0.20(0.18-0.23) |
| Tonga | 0.92(0.72-1.1) | 69.74(50.14-92.55) | 2.3(1.7-2.9) | 84.95(60.50-116.22) | 0.50(0.46-0.54) |
| Trinidad and Tobago | 55(50-60) | 219.68(193.89-247.89) | 142(109-177) | 223.68(171.31-281.69) | 0.39(0.02-0.75) |
| Tunisia | 116(92-140) | 93.73(68.28-122.92) | 420(314-553) | 106.84(73.70-149.89) | 0.34(0.26-0.41) |
| T眉rkiye | 1,423(1,162-1,713) | 159.19(118.92-206.62) | 5,470(4,310-6,759) | 192.44(142.52-253.31) | 1.34(1.12-1.55) |
| Turkmenistan | 22(19-25) | 41.60(35.64-47.93) | 35(27-44) | 37.81(29.03-48.22) | -0.02(-0.07-0.03) |
| Tuvalu | 0.11(0.087-0.14) | 96.75(70.52-132.63) | 0.27(0.21-0.35) | 107.43(78.12-144.20) | 0.34(0.33-0.36) |
| Uganda | 126(101-155) | 86.89(63.57-113.65) | 309(248-390) | 98.16(71.05-132.75) | 0.36(0.33-0.39) |
| Ukraine | 5,239(4,711-5,747) | 193.44(167.96-220.71) | 4,583(3,628-5,720) | 157.31(120.94-201.22) | -1.51(-1.91--1.11) |
| United Arab Emirates | 11(7.6-15) | 149.74( 99.92-209.93) | 31(22-43) | 204.80(137.52-302.88) | 1.55(-0.18-3.29) |
| United Kingdom | 16,546(15,051-17,228) | 426.38(385.13-448.35) | 24,225(20,912-25,978) | 413.12(356.88-444.90) | -0.50(-0.84--0.15) |
| United Republic of Tanzania | 165(133-203) | 72.53(54.37-94.86) | 557(422-707) | 93.45(65.02-126.84) | 0.70(0.68-0.72) |
| United States of America | 58,434(51,012-62,421) | 447.79(386.83-481.73) | 72,602(60,132-79,110) | 314.62(261.97-344.09) | -4.24(-4.44--4.04) |
| United States Virgin Islands | 7.1(5.8-8.7) | 335.71(251.93-442.85) | 19(14-25) | 256.81(181.28-352.51) | -2.80(-3.38--2.23) |
| Uruguay | 476(419-522) | 322.53(273.09-371.07) | 1,092(936-1,241) | 430.43(355.28-508.83) | 3.40(2.77-4.03) |
| Uzbekistan | 148(125-172) | 39.35(32.82-46.19) | 202(161-247) | 34.44(27.18-42.47) | -0.17(-0.24--0.10) |
| Vanuatu | 0.9(0.67-1.2) | 89.46(62.80-125.74) | 3.1(2.3-4) | 93.40(67.03-129.50) | 0.12(0.11-0.13) |
| Venezuela (Bolivarian Republic of) | 273(240-307) | 98.39(84.59-112.14) | 1,275(958-1,631) | 142.22(105.56-185.67) | 1.41(1.14-1.68) |
| Viet Nam | 678(550-829) | 58.19(43.29-77.03) | 3,245(2,570-3,962) | 123.51(89.36-161.11) | 2.18(2.12-2.24) |
| Yemen | 48(36-64) | 51.55(35.63-73.58) | 195(132-270) | 63.39(41.10-92.24) | 0.37(0.35-0.38) |
| Zambia | 46(36-56) | 77.61(56.44-102.97) | 163(117-225) | 121.44(81.24-176.48) | 1.39(1.32-1.46) |
| Zimbabwe | 92(73-114) | 110.50(81.42-147.42) | 158(127-194) | 128.02(93.47-169.26) | 0.78(0.69-0.88) |

**Supplementary Table 4** DALYs of 204 countries and regions

| **Location** | **Cases (n),1990** | **DALYs(per 100,000 population),1990** | **Cases (n),2021** | **DALYs(per 100,000 population),2021** | **AAPC,1990–2021** |
| --- | --- | --- | --- | --- | --- |
| Afghanistan | 1,937(1,083-2,858) | 1,195.10(662.33-1,794.82) | 3,101(1,892-4,327) | 1,350.42(802.26-1,955.09) | 5.06(4.82-5.30) |
| Albania | 716(591-852) | 1,312.38(1,029.38-1,650.74) | 2,237(1,747-2,871) | 1,410.71(1,051.61-1,890.86) | 4.40(2.87-5.92) |
| Algeria | 2,306(1,880-2,830) | 956.73(720.51-1,258.73) | 7,016(5,424-8,870) | 826.80(592.41-1,132.94) | -3.82(-4.28--3.36) |
| American Samoa | 9.6(7.8-11) | 2,216.02(1,697.00-2,842.07) | 27(23-33) | 2,286.89(1,742.14-2,957.50) | 4.10(2.52-5.68) |
| Andorra | 79(57-109) | 4,210.20(2,869.28-5,930.24) | 179(130-236) | 2,981.04(2,037.83-4,155.02) | -36.34(-42.03--30.65) |
| Angola | 594(433-775) | 964.72(660.76-1,354.20) | 2,367(1,708-3,166) | 1,172.09(785.86-1,702.61) | 6.74(6.35-7.12) |
| Antigua and Barbuda | 46(41-51) | 1,978.69(1,737.19-2,239.86) | 82(72-91) | 2,601.86(2,252.26-2,953.02) | 23.09(17.62-28.56) |
| Argentina | 36,514(32,494-40,385) | 3,414.84(2,900.78-3,959.99) | 65,085(56,208-73,606) | 2,964.19(2,438.12-3,496.14) | -11.57(-14.75--8.40) |
| Armenia | 1,179(1,037-1,323) | 1,463.15(1,274.30-1,643.01) | 2,791(2,400-3,202) | 1,988.04(1,696.01-2,292.52) | 19.47(15.83-23.11) |
| Australia | 25,882(22,814-28,701) | 3,588.87(3,066.63-4,069.94) | 49,333(40,809-56,981) | 2,531.99(2,071.07-2,966.51) | -36.48(-38.90--34.06) |
| Austria | 22,167(19,936-24,108) | 4,159.02(3,605.29-4,667.85) | 18,073(15,056-20,933) | 2,150.82(1,765.70-2,525.22) | -65.17(-69.00--61.34) |
| Azerbaijan | 1,249(1,055-1,449) | 842.19(674.09-1,029.75) | 1,755(1,341-2,215) | 839.05(598.66-1,089.17) | 0.10(-0.64-0.83) |
| Bahamas | 89(81-99) | 1,895.56(1,639.01-2,176.36) | 308(255-367) | 2,743.22(2,215.99-3,349.18) | 27.19(19.83-34.55) |
| Bahrain | 58(47-70) | 2,204.46(1,671.49-2,812.16) | 193(155-243) | 2,150.88(1,592.24-2,942.17) | -1.31(-4.94-2.32) |
| Bangladesh | 5,874(4,489-7,588) | 449.23(318.21-622.98) | 17,274(12,941-23,784) | 432.48(302.46-617.79) | 0.30(-0.24-0.83) |
| Barbados | 387(349-430) | 2,880.13(2,514.86-3,299.45) | 779(627-935) | 4,086.30(3,229.16-5,033.14) | 41.31(37.11-45.51) |
| Belarus | 9,461(8,347-10,674) | 1,932.49(1,671.62-2,228.14) | 13,130(10,445-16,116) | 2,399.49(1,877.83-2,975.59) | 18.54(15.46-20.24) |
| Belgium | 29,896(26,225-33,019) | 4,616.01(3,858.71-5,340.19) | 28,145(23,208-32,675) | 2,601.71(2,056.49-3,127.39) | -63.04(-65.55--60.53) |
| Belize | 32(29-36) | 988.59(858.65-1,127.20) | 109(93-125) | 1,348.13(1,123.04-1,565.87) | 10.23(7.32-13.13) |
| Benin | 435(356-523) | 741.13(565.82-961.90) | 1,198(937-1,485) | 952.24(695.99-1,290.68) | 7.01(6.64-7.38) |
| Bermuda | 99(89-109) | 4,846.35(4,157.64-5,608.06) | 211(170-263) | 3,591.29(2,816.69-4,568.30) | -41.74(-45.28--38.20) |
| Bhutan | 20(12-27) | 464.39(274.62-662.55) | 108(73-143) | 569.51(365.82-800.73) | 3.40(3.29-3.51) |
| Bolivia (Plurinational State of) | 1,624(1,072-2,240) | 1,937.82(1,211.63-2,780.04) | 5,803(3,776-7,796) | 2,308.77(1,476.97-3,300.23) | 12.61(12.13-13.09) |
| Bosnia and Herzegovina | 2,190(1,868-2,535) | 1,911.60(1,580.37-2,275.75) | 6,984(5,617-8,560) | 3,032.48(2,375.61-3,789.50) | 36.27(33.49-39.06) |
| Botswana | 155(114-197) | 1,457.33(1,015.46-1,987.39) | 499(388-639) | 1,616.78(1,164.50-2,242.15) | 3.48(1.73-5.23) |
| Brazil | 33,049(30,148-35,019) | 1,421.49(1,269.63-1,533.23) | 127,396(109,561-138,684) | 1,533.57(1,311.75-1,689.76) | 3.22(2.03-4.42) |
| Brunei Darussalam | 98(77-122) | 3,780.37(2,813.14-5,017.30) | 216(177-268) | 3,197.86(2,463.44-4,086.31) | -22.42(-26.89--17.95) |
| Bulgaria | 10,880(9,472-12,582) | 2,729.15(2,354.04-3,170.38) | 22,041(18,052-26,221) | 3,603.58(2,936.88-4,297.27) | 28.28(20.91-35.66) |
| Burkina Faso | 811(649-1,001) | 794.52(589.12-1,045.63) | 2,340(1,811-3,008) | 1,039.80(748.33-1,407.99) | 7.91(7.31-8.52) |
| Burundi | 659(513-830) | 1,090.45(800.15-1,447.53) | 1,072(793-1,442) | 1,179.42(806.93-1,661.88) | 2.71(2.36-3.06) |
| Cabo Verde | 61(51-72) | 627.09(473.58-813.91) | 243(178-296) | 1,794.05(1,234.00-2,383.82) | 39.46(36.85-42.08) |
| Cambodia | 1,382(989-1,822) | 1,409.52(970.00-1,952.15) | 5,306(3,964-6,760) | 1,887.11(1,348.53-2,577.18) | 15.66(15.37-15.94) |
| Cameroon | 973(788-1,201) | 1,000.31(756.55-1,308.40) | 3,244(2,406-4,364) | 1,218.46(840.60-1,709.05) | 7.11(6.59-7.62) |
| Canada | 41,190(36,615-44,704) | 3,389.30(2,933.17-3,812.68) | 78,349(66,918-88,578) | 2,579.37(2,099.11-3,027.77) | -25.96(-28.50--23.43) |
| Central African Republic | 178(133-249) | 1,100.61(755.45-1,610.76) | 329(230-467) | 1,095.06(713.39-1,638.30) | -0.01(-0.23-0.21) |
| Chad | 511(406-668) | 630.88(456.83-872.47) | 1,259(967-1,591) | 969.84(700.20-1,300.24) | 11.07(10.85-11.30) |
| Chile | 6,516(5,811-7,122) | 2,077.25(1,782.82-2,398.22) | 20,915(17,982-23,483) | 2,175.49(1,767.15-2,558.61) | 2.96(0.50-5.42) |
| China | 371,385(323,600-419,404) | 2,065.92(1,770.18-2,356.64) | 1,374,963(1,121,844-1,623,509) | 2,102.93(1,704.43-2,486.70) | 1.45(-0.29-3.18) |
| Colombia | 6,945(6,119-7,759) | 1,442.40(1,248.11-1,636.77) | 29,746(23,830-36,275) | 1,525.61(1,211.14-1,871.17) | 1.72(0.11-3.32) |
| Comoros | 44(32-58) | 1,109.50(777.66-1,530.39) | 177(131-240) | 1,460.70(984.37-2,067.89) | 11.08(10.82-11.34) |
| Congo | 272(210-350) | 1,352.61(945.63-1,867.20) | 679(537-843) | 1,375.58(1,005.81-1,853.03) | 1.05(0.53-1.57) |
| Cook Islands | 3.9(3.2-4.6) | 1,222.54(901.49-1,579.82) | 8.7(6.9-11) | 926.79(672.94-1,244.74) | -9.13(-9.54--8.71) |
| Costa Rica | 883(782-983) | 1,538.82(1,332.01-1,762.25) | 4,355(3,669-5,017) | 2,274.99(1,858.33-2,710.17) | 29.14(24.64-33.64) |
| C么te d'Ivoire | 386(315-464) | 593.49(445.14-780.44) | 1,332(1,080-1,726) | 606.63(445.74-823.07) | 0.37(0.10-0.64) |
| Croatia | 8,243(7,155-9,367) | 4,569.21(3,904.88-5,247.74) | 16,076(13,327-19,248) | 4,155.30(3,411.49-4,983.01) | -18.83(-31.33--6.34) |
| Cuba | 9,523(8,541-10,419) | 2,573.47(2,222.60-2,931.74) | 24,196(20,663-28,230) | 3,076.75(2,490.39-3,734.28) | 16.89(14.76-19.02) |
| Cyprus | 885(679-1,091) | 4,244.08(2,925.17-5,624.43) | 1,885(1,544-2,293) | 2,574.71(1,932.51-3,364.86) | -58.54(-62.20--54.89) |
| Czechia | 29,461(26,511-33,024) | 5,215.13(4,538.20-5,968.56) | 30,098(25,402-35,193) | 3,269.99(2,643.26-3,939.52) | -64.98(-69.25--60.70) |
| Democratic People's Republic of Korea | 4,938(3,659-6,748) | 1,392.87(981.84-1,960.11) | 13,191(8,607-19,979) | 1,171.01(734.67-1,852.03) | -7.30(-7.59--7.01) |
| Democratic Republic of the Congo | 2,118(1,576-2,865) | 880.43(620.70-1,281.37) | 5,841(3,921-8,992) | 896.99(553.14-1,483.16) | 0.63(0.43-0.83) |
| Denmark | 13,235(11,741-14,434) | 3,688.37(3,186.52-4,132.76) | 19,567(16,695-22,098) | 3,644.03(3,033.33-4,206.12) | 6.93(1.40-12.45) |
| Djibouti | 24(18-33) | 1,202.12(837.30-1,718.89) | 177(130-235) | 1,836.16(1,281.41-2,548.47) | 20.69(20.45-20.93) |
| Dominica | 48(40-59) | 2,169.16(1,680.24-2,819.43) | 68(56-83) | 2,563.20(1,971.34-3,298.97) | 12.46(11.75-13.18) |
| Dominican Republic | 1,166(916-1,441) | 1,208.68(928.47-1,564.65) | 4,567(3,430-6,148) | 1,347.12(977.32-1,870.65) | 3.66(2.24-5.08) |
| Ecuador | 1,926(1,719-2,129) | 1,224.84(1,054.26-1,408.78) | 8,144(6,439-10,109) | 1,474.73(1,139.67-1,869.00) | 5.18(2.35-8.01) |
| Egypt | 3,079(2,570-4,060) | 665.93(511.10-899.28) | 13,423(10,687-16,173) | 1,258.70(950.61-1,590.04) | 19.17(18.11-20.23) |
| El Salvador | 665(580-754) | 696.01(566.53-839.72) | 2,664(2,104-3,257) | 1,087.96(829.55-1,401.92) | 11.97(10.68-13.26) |
| Equatorial Guinea | 38(28-50) | 1,015.18(696.91-1,420.36) | 162(117-215) | 1,531.80(1,025.19-2,186.61) | 17.01(16.32-17.69) |
| Eritrea | 126(97-166) | 1,070.19(760.42-1,477.41) | 723(541-925) | 1,606.80(1,119.91-2,194.90) | 18.79(16.38-20.13) |
| Estonia | 2,014(1,832-2,199) | 2,470.40(2,149.14-2,799.11) | 3,936(3,222-4,582) | 3,117.11(2,522.35-3,682.38) | 17.39(12.92-21.86) |
| Eswatini | 100(66-135) | 1,652.15(1,058.36-2,362.20) | 229(146-303) | 2,064.01(1,283.27-2,907.87) | 14.18(12.82-15.54) |
| Ethiopia | 8,794(5,773-10,661) | 2,822.58(1,836.02-3,527.36) | 28,914(24,512-34,360) | 2,655.64(2,139.39-3,266.56) | -4.82(-5.49--4.15) |
| Fiji | 77(60-96) | 1,159.59(851.55-1,528.54) | 225(169-289) | 1,427.44(1,007.45-1,928.58) | 8.34(7.32-9.37) |
| Finland | 7,464(6,656-8,125) | 2,584.79(2,208.11-2,933.31) | 12,110(9,779-13,972) | 2,032.85(1,613.23-2,396.58) | -21.06(-23.43--18.68) |
| France | 154,958(137,880-171,246) | 4,119.50(3,526.10-4,722.54) | 188,325(151,476-219,835) | 2,726.19(2,172.43-3,230.37) | -43.35(-45.34--41.35) |
| Gabon | 267(166-384) | 1,727.39(1,021.89-2,644.99) | 421(318-539) | 1,893.89(1,319.04-2,586.35) | 5.87(5.12-6.62) |
| Gambia | 31(25-38) | 388.24(287.98-511.55) | 115(90-147) | 450.02(322.96-618.17) | 2.09(1.91-2.28) |
| Georgia | 2,224(1,979-2,456) | 1,044.51(893.99-1,207.88) | 3,706(3,253-4,153) | 1,713.05(1,441.74-2,018.50) | 22.50(16.83-28.17) |
| Germany | 260,917(229,218-287,982) | 4,649.70(3,953.91-5,333.06) | 240,669(194,939-279,801) | 2,552.36(2,045.86-3,023.82) | -66.41(-70.89--61.94) |
| Ghana | 1,044(824-1,311) | 815.38(596.98-1,087.91) | 4,149(3,273-5,168) | 1,165.50(832.36-1,582.70) | 11.33(11.00-11.65) |
| Greece | 17,499(15,669-19,200) | 3,066.58(2,665.78-3,438.03) | 31,652(26,890-35,726) | 2,542.00(2,127.96-2,921.40) | -20.64(-24.04--17.25) |
| Greenland | 40(34-46) | 6,022.55(4,765.53-7,613.65) | 58(47-72) | 3,682.88(2,701.90-4,859.01) | -71.22(-75.80--66.64) |
| Grenada | 61(53-70) | 1,826.93(1,534.65-2,152.00) | 100(85-115) | 2,963.05(2,446.84-3,528.91) | 43.43(38.72-48.14) |
| Guam | 31(25-36) | 2,365.89(1,841.04-2,909.66) | 67(52-81) | 962.36(716.74-1,210.91) | -49.21(-57.80--40.62) |
| Guatemala | 560(506-620) | 778.44(688.25-882.01) | 3,293(2,841-3,815) | 975.69(820.37-1,155.36) | 7.44(5.16-9.71) |
| Guinea | 505(390-634) | 569.39(407.03-763.04) | 956(728-1,247) | 666.74(477.72-922.86) | 3.28(3.13-3.42) |
| Guinea-Bissau | 80(55-103) | 959.31(634.91-1,301.93) | 156(118-197) | 1,265.31(901.43-1,725.76) | 9.99(9.70-10.29) |
| Guyana | 164(142-185) | 1,595.72(1,344.90-1,858.84) | 284(224-353) | 1,804.72(1,384.82-2,269.56) | 7.40(3.61-11.18) |
| Haiti | 1,329(915-1,767) | 2,058.66(1,383.09-2,844.62) | 2,897(2,053-4,015) | 1,976.61(1,345.21-2,778.50) | -2.36(-2.63--2.10) |
| Honduras | 287(231-356) | 515.48(386.16-679.85) | 1,544(1,129-2,059) | 890.08(613.15-1,233.84) | 13.27(12.43-14.11) |
| Hungary | 26,823(22,536-30,786) | 4,660.51(3,892.63-5,410.46) | 30,431(25,183-36,223) | 3,643.48(3,015.47-4,373.25) | -29.95(-33.37--26.52) |
| Iceland | 305(265-340) | 2,634.24(2,221.97-3,040.48) | 526(424-628) | 2,188.97(1,745.53-2,643.31) | -11.72(-14.96--8.49) |
| India | 36,849(30,082-43,550) | 392.42(315.20-468.88) | 153,353(135,865-173,194) | 476.48(417.54-547.22) | 3.15(2.19-4.12) |
| Indonesia | 21,301(15,902-25,904) | 1,066.86(796.54-1,315.12) | 83,138(66,141-101,076) | 1,726.19(1,336.31-2,129.55) | 21.36(21.16-21.55) |
| Iran (Islamic Republic of) | 3,895(3,307-4,511) | 1,015.19(832.16-1,193.23) | 24,674(20,649-27,400) | 1,154.22(953.00-1,316.37) | 4.37(3.82-4.91) |
| Iraq | 1,307(1,036-1,671) | 546.34(398.77-731.66) | 4,538(3,535-5,515) | 872.31(626.68-1,135.78) | 11.66(10.83-12.49) |
| Ireland | 6,729(6,084-7,331) | 4,291.13(3,696.53-4,898.97) | 8,765(7,194-10,012) | 2,735.31(2,176.61-3,267.52) | -50.93(-55.77--46.09) |
| Israel | 7,078(6,072-8,102) | 3,876.36(3,210.60-4,539.44) | 13,321(10,290-15,908) | 2,651.73(2,028.78-3,211.37) | -41.72(-45.16--38.28) |
| Italy | 121,340(109,134-128,911) | 3,292.43(2,911.64-3,542.40) | 190,626(156,505-212,036) | 2,631.22(2,171.16-2,926.92) | -35.77(-41.35--30.44) |
| Jamaica | 1,299(1,145-1,451) | 1,806.23(1,516.50-2,107.28) | 2,498(1,989-3,190) | 2,217.35(1,712.13-2,848.34) | 15.57(10.16-20.99) |
| Japan | 178,351(160,759-188,846) | 3,022.25(2,668.56-3,229.94) | 550,362(437,544-614,325) | 2,694.04(2,165.32-2,997.87) | -13.21(-14.59--11.82) |
| Jordan | 344(276-430) | 1,302.76(954.31-1,701.62) | 2,080(1,534-2,824) | 1,301.06(903.04-1,832.12) | 0.27(-1.88-2.43) |
| Kazakhstan | 6,551(5,648-7,503) | 1,631.74(1,395.07-1,874.44) | 5,762(4,843-6,694) | 1,319.25(1,107.04-1,536.61) | -7.29(-9.86--4.72) |
| Kenya | 942(758-1,225) | 479.81(380.74-627.50) | 4,152(3,382-5,062) | 920.13(731.07-1,133.32) | 14.40(13.75-15.05) |
| Kiribati | 7.6(5.8-10) | 1,080.73(762.90-1,483.95) | 16(12-20) | 1,217.32(894.93-1,637.71) | 4.50(4.32-4.67) |
| Kuwait | 99(85-110) | 884.56(727.29-1,041.00) | 849(684-1,034) | 1,468.07(1,125.96-1,862.55) | 21.46(15.04-27.88) |
| Kyrgyzstan | 1,054(893-1,209) | 1,084.31(904.00-1,263.68) | 880(698-1,100) | 874.21(693.46-1,099.14) | -5.96(-7.34--4.58) |
| Lao People's Democratic Republic | 628(382-847) | 1,439.35(873.86-2,053.03) | 1,756(1,287-2,256) | 1,679.56(1,151.37-2,295.46) | 7.79(7.65-7.93) |
| Latvia | 3,305(2,945-3,677) | 2,317.98(1,992.43-2,663.04) | 4,842(3,975-5,748) | 2,547.41(2,040.28-3,080.94) | 8.51(5.16-11.85) |
| Lebanon | 1,116(781-1,418) | 2,045.09(1,399.92-2,667.64) | 5,016(3,876-6,624) | 1,981.02(1,448.52-2,677.89) | -3.14(-4.52--1.76) |
| Lesotho | 237(179-313) | 1,028.32(724.25-1,447.76) | 420(300-597) | 1,839.68(1,234.64-2,749.93) | 26.51(25.12-27.89) |
| Liberia | 236(187-301) | 797.32(591.36-1,059.50) | 407(270-589) | 916.72(570.10-1,397.81) | 3.53(3.21-3.85) |
| Libya | 971(717-1,296) | 1,901.76(1,336.64-2,620.91) | 2,638(1,915-3,498) | 2,023.53(1,417.69-2,820.24) | 3.55(1.01-6.10) |
| Lithuania | 3,834(3,475-4,168) | 2,190.42(1,912.15-2,480.02) | 7,305(5,992-8,704) | 2,667.86(2,162.49-3,230.96) | 12.38(9.32-15.44) |
| Luxembourg | 970(879-1,057) | 4,408.56(3,901.13-4,928.32) | 1,236(1,058-1,383) | 2,794.45(2,340.42-3,184.68) | -52.75(-59.61--45.88) |
| Madagascar | 1,055(866-1,267) | 954.05(710.79-1,246.96) | 1,855(1,338-2,382) | 1,103.12(762.61-1,525.35) | 5.18(4.75-5.60) |
| Malawi | 384(315-464) | 520.47(392.37-679.47) | 920(726-1,206) | 605.40(440.77-837.68) | 3.22(2.98-3.46) |
| Malaysia | 5,462(4,475-6,485) | 2,128.04(1,609.51-2,753.79) | 21,483(17,459-25,315) | 2,783.98(2,125.25-3,606.53) | 15.37(7.27-23.48) |
| Maldives | 13(10-17) | 914.78(661.12-1,241.22) | 66(53-80) | 762.03(557.01-986.65) | -5.23(-5.94--4.52) |
| Mali | 761(619-930) | 962.21(718.97-1,255.97) | 2,031(1,597-2,575) | 1,059.05(761.80-1,446.16) | 3.38(3.04-3.72) |
| Malta | 474(413-546) | 3,193.26(2,676.99-3,714.53) | 1,064(850-1,253) | 2,465.84(1,945.96-2,937.02) | -23.52(-27.38--19.67) |
| Marshall Islands | 5.5(4.4-6.9) | 1,528.35(1,119.86-2,019.80) | 7.4(5.7-9.7) | 1,601.48(1,146.14-2,174.84) | 2.15(1.61-2.69) |
| Mauritania | 249(198-312) | 955.82(696.84-1,270.38) | 689(496-908) | 1,218.64(847.30-1,695.67) | 8.56(8.30-8.82) |
| Mauritius | 206(187-226) | 1,155.49(1,005.46-1,309.96) | 1,053(936-1,152) | 1,942.11(1,669.55-2,199.87) | 21.94(18.77-25.10) |
| Mexico | 12,318(11,646-12,876) | 1,058.61(989.02-1,115.83) | 45,904(41,062-50,919) | 1,146.97(1,017.08-1,275.39) | 3.21(2.36-4.07) |
| Micronesia (Federated States of) | 21(16-26) | 1,689.16(1,242.03-2,291.58) | 20(15-27) | 1,717.96(1,170.36-2,399.74) | 0.86(0.74-0.98) |
| Monaco | 142(108-174) | 4,106.68(2,938.77-5,391.70) | 222(174-264) | 4,709.98(3,477.97-6,088.76) | 20.04(19.05-21.03) |
| Mongolia | 237(184-298) | 749.48(568.01-967.22) | 504(388-618) | 1,008.30(771.70-1,287.75) | 7.58(6.13-9.02) |
| Montenegro | 441(378-516) | 2,031.99(1,646.62-2,505.07) | 982(821-1,149) | 3,110.09(2,433.91-3,792.95) | 41.60(37.99-45.22) |
| Morocco | 3,066(2,470-3,798) | 747.43(538.88-1,007.29) | 10,818(8,114-14,016) | 1,128.96(790.77-1,564.15) | 12.43(12.21-12.64) |
| Mozambique | 648(517-777) | 556.37(409.95-725.31) | 1,416(1,066-1,786) | 709.17(489.55-973.00) | 5.27(4.99-5.56) |
| Myanmar | 6,287(4,311-9,087) | 1,250.30(812.58-1,838.55) | 18,589(13,419-24,126) | 1,504.68(1,034.71-2,047.84) | 8.24(8.08-8.41) |
| Namibia | 86(67-109) | 695.56(508.74-924.48) | 266(203-330) | 835.78(605.24-1,097.86) | 4.94(4.56-5.31) |
| Nauru | 1.6(1-2.3) | 2,329.47(1,464.90-3,460.72) | 2.3(1.5-3.1) | 2,190.58(1,322.19-3,027.62) | -4.15(-4.39--3.91) |
| Nepal | 778(581-1,040) | 420.87(290.38-585.88) | 3,059(2,307-4,091) | 503.38(353.50-703.72) | 2.60(2.49-2.71) |
| Netherlands | 34,844(30,825-38,390) | 4,318.55(3,682.02-4,915.16) | 56,978(47,893-65,455) | 3,827.85(3,117.65-4,490.03) | -28.46(-30.58--25.89) |
| New Zealand | 6,607(5,749-7,496) | 4,458.13(3,758.01-5,194.81) | 12,135(10,117-14,153) | 3,527.71(2,860.24-4,190.89) | -31.01(-36.44--25.59) |
| Nicaragua | 267(225-319) | 632.60(492.59-805.75) | 1,170(924-1,455) | 800.47(589.41-1,062.02) | 5.69(4.78-6.61) |
| Niger | 351(259-453) | 673.96(461.48-931.60) | 1,458(1,082-1,974) | 849.62(593.01-1,215.34) | 5.62(5.35-5.89) |
| Nigeria | 8,736(7,181-10,445) | 779.53(636.66-938.07) | 19,571(16,964-22,550) | 949.13(808.63-1,104.42) | 5.53(5.22-5.84) |
| Niue | 1.6(1.3-1.9) | 1,644.39(1,216.77-2,176.46) | 1.3(1-1.6) | 1,819.30(1,357.24-2,381.97) | 5.59(5.26-5.93) |
| North Macedonia | 1,335(1,131-1,610) | 2,459.20(2,013.37-3,040.51) | 3,183(2,585-3,860) | 3,370.14(2,704.65-4,103.98) | 31.60(27.97-35.24) |
| Northern Mariana Islands | 5.2(4.1-6.5) | 2,316.91(1,739.83-3,062.44) | 20(16-24) | 2,400.73(1,823.89-3,078.33) | -3.37(-9.31-2.57) |
| Norway | 12,210(10,819-13,007) | 4,001.15(3,557.36-4,313.76) | 15,759(13,200-17,358) | 3,600.98(3,019.73-3,995.60) | -15.71(-19.23--12.20) |
| Oman | 82(61-107) | 523.74(369.55-724.04) | 217(153-284) | 586.76(388.56-807.85) | 2.05(0.62-3.48) |
| Pakistan | 9,493(7,615-11,163) | 618.28(481.82-770.57) | 21,682(17,804-26,491) | 805.68(636.41-1,015.62) | 6.17(6.02-6.31) |
| Palau | 5.7(4.2-7.5) | 2,402.51(1,637.13-3,392.00) | 9.7(7.4-13) | 2,409.46(1,692.15-3,316.90) | -0.01(-0.77-0.75) |
| Palestine | 624(496-762) | 2,682.65(1,954.54-3,539.70) | 1,298(1,084-1,539) | 2,368.64(1,835.58-3,054.11) | -10.42(-12.61--8.24) |
| Panama | 607(532-672) | 1,270.77(1,083.85-1,435.02) | 2,629(2,000-3,155) | 1,618.64(1,228.44-1,976.02) | 12.88(10.85-14.92) |
| Papua New Guinea | 114(84-152) | 452.59(320.10-627.50) | 373(281-488) | 440.84(314.28-599.38) | -0.29(-0.37--0.22) |
| Paraguay | 646(527-766) | 938.10(721.06-1,177.48) | 2,893(2,239-3,674) | 1,609.29(1,170.34-2,176.50) | 30.89(26.98-34.82) |
| Peru | 4,574(3,878-5,429) | 1,266.20(1,001.72-1,568.29) | 17,858(13,451-22,779) | 1,529.59(1,093.48-2,040.65) | 9.18(5.99-12.37) |
| Philippines | 9,002(7,981-10,924) | 1,342.65(1,169.22-1,664.54) | 30,547(26,454-35,107) | 1,556.47(1,327.68-1,810.83) | 7.20(6.08-8.32) |
| Poland | 50,293(47,176-52,785) | 3,158.07(2,932.49-3,327.18) | 109,404(96,491-119,268) | 4,008.22(3,527.64-4,397.66) | 27.83(25.69-29.98) |
| Portugal | 19,857(17,830-21,748) | 4,014.51(3,466.45-4,602.91) | 36,006(29,243-40,843) | 2,978.87(2,411.34-3,515.13) | -33.18(-35.86--30.51) |
| Puerto Rico | 2,902(2,582-3,235) | 2,237.13(1,924.00-2,560.75) | 6,696(5,499-8,082) | 1,963.48(1,549.94-2,427.20) | -10.29(-14.32--6.26) |
| Qatar | 29(23-36) | 2,471.80(1,796.83-3,289.06) | 188(143-257) | 2,183.42(1,548.13-3,146.25) | -11.35(-20.36--2.35) |
| Republic of Korea | 13,748(11,671-15,670) | 2,091.39(1,667.65-2,579.50) | 85,371(67,865-103,386) | 2,509.58(1,890.73-3,178.38) | 13.81(12.39-15.23) |
| Republic of Moldova | 2,778(2,486-3,051) | 2,099.29(1,795.84-2,421.93) | 3,971(3,377-4,655) | 1,958.96(1,616.46-2,334.17) | -5.65(-9.91--1.38) |
| Romania | 13,347(11,390-15,638) | 1,374.01(1,150.27-1,624.26) | 45,038(37,693-53,851) | 2,933.52(2,433.71-3,518.88) | 51.41(48.45-54.37) |
| Russian Federation | 135,219(128,027-141,519) | 2,067.64(1,937.20-2,179.15) | 230,697(208,916-249,649) | 2,933.85(2,654.14-3,189.64) | 28.22(25.83-30.61) |
| Rwanda | 647(500-798) | 1,244.63(903.94-1,645.73) | 1,717(1,218-2,267) | 1,401.88(932.44-1,989.10) | 4.66(4.11-5.21) |
| Saint Kitts and Nevis | 38(34-42) | 2,623.48(2,316.19-2,944.77) | 43(37-48) | 2,883.23(2,450.88-3,326.86) | 7.70(2.63-12.77) |
| Saint Lucia | 52(47-58) | 1,974.75(1,751.86-2,208.51) | 150(123-180) | 1,814.47(1,489.88-2,188.57) | -9.36(-11.14--7.58) |
| Saint Vincent and the Grenadines | 47(43-52) | 1,935.88(1,698.35-2,201.74) | 99(87-112) | 2,133.17(1,833.57-2,463.44) | 3.23(-1.25-7.71) |
| Samoa | 28(22-35) | 1,397.52(1,033.33-1,844.24) | 52(41-64) | 1,331.12(991.39-1,739.61) | -2.18(-2.37--2.00) |
| San Marino | 66(53-82) | 4,501.22(3,427.08-5,796.17) | 78(55-107) | 2,129.07(1,404.20-3,026.47) | -82.91(-90.31--75.51) |
| Sao Tome and Principe | 27(22-32) | 1,402.32(1,038.23-1,839.95) | 48(39-61) | 1,837.81(1,342.84-2,520.07) | 13.73(12.54-14.92) |
| Saudi Arabia | 1,032(779-1,336) | 773.60(551.37-1,079.68) | 2,481(2,020-3,029) | 1,040.74(775.83-1,375.38) | 8.76(8.51-9.00) |
| Senegal | 674(545-829) | 833.71(623.96-1,085.56) | 2,279(1,703-2,897) | 1,166.11(829.19-1,601.32) | 10.73(10.47-11.00) |
| Serbia | 10,216(8,489-12,607) | 4,476.90(3,574.64-5,655.47) | 20,751(17,048-24,765) | 3,052.53(2,386.45-3,864.93) | -43.78(-47.35--40.21) |
| Seychelles | 44(37-52) | 2,146.22(1,645.07-2,770.14) | 97(81-112) | 3,008.22(2,338.68-3,845.69) | 19.10(12.13-26.06) |
| Sierra Leone | 429(330-540) | 703.82(506.15-945.91) | 840(637-1,105) | 875.79(612.79-1,216.35) | 5.71(5.44-5.98) |
| Singapore | 1,964(1,714-2,225) | 3,321.85(2,841.65-3,835.95) | 6,143(5,053-7,249) | 2,275.99(1,820.37-2,773.67) | -29.96(-33.85--26.06) |
| Slovakia | 8,568(7,235-10,079) | 3,704.03(2,952.64-4,527.30) | 13,525(10,614-16,747) | 3,893.46(2,957.35-5,000.30) | -8.14(-13.75--2.53) |
| Slovenia | 3,336(2,974-3,695) | 3,333.84(2,847.02-3,842.91) | 5,959(4,725-7,220) | 3,037.47(2,401.69-3,709.26) | -8.14(-13.75--2.53) |
| Solomon Islands | 26(20-34) | 1,249.52(896.21-1,713.02) | 89(68-116) | 1,291.47(910.05-1,784.79) | 1.32(1.05-1.58) |
| Somalia | 414(287-602) | 1,074.98(701.17-1,628.49) | 980(625-1,419) | 1,244.89(762.84-1,874.19) | 5.64(5.30-5.98) |
| South Africa | 7,247(6,072-9,642) | 1,297.25(1,059.52-1,742.65) | 19,800(17,809-21,705) | 1,647.01(1,435.94-1,848.02) | 11.14(9.80-12.48) |
| South Sudan | 715(495-1,007) | 1,166.75(772.26-1,681.69) | 1,131(787-1,494) | 1,541.48(1,041.90-2,139.85) | 12.65(12.37-12.93) |
| Spain | 71,553(62,784-79,097) | 3,386.40(2,899.19-3,843.92) | 140,136(111,422-164,871) | 2,944.70(2,333.02-3,532.05) | -13.33(-14.76--11.90) |
| Sri Lanka | 1,877(1,602-2,219) | 718.43(556.60-917.97) | 5,045(3,558-6,707) | 618.07(403.62-862.39) | -3.82(-4.99--2.65) |
| Sudan | 1,748(1,263-2,399) | 744.10(503.07-1,078.20) | 4,280(2,964-6,023) | 896.48(586.98-1,303.49) | 4.92(4.84-5.01) |
| Suriname | 137(118-156) | 1,916.34(1,521.45-2,417.51) | 393(285-499) | 1,955.72(1,357.35-2,670.58) | -0.40(-5.46-4.66) |
| Sweden | 21,959(19,245-24,422) | 3,173.50(2,679.57-3,647.41) | 29,788(24,021-35,508) | 2,815.09(2,234.34-3,437.70) | -9.66(-12.72--6.61) |
| Switzerland | 11,681(10,195-12,998) | 2,517.45(2,129.39-2,866.09) | 16,654(12,947-19,845) | 1,934.45(1,499.21-2,328.33) | -15.74(-18.69--12.80) |
| Syrian Arab Republic | 1,053(836-1,274) | 856.38(647.10-1,092.52) | 2,891(2,189-3,904) | 975.78(708.79-1,320.04) | 2.75(2.06-3.45) |
| Taiwan (Province of China) | 8,911(8,076-9,683) | 1,213.39(1,014.39-1,409.64) | 55,979(47,227-64,471) | 2,295.68(1,806.28-2,815.75) | 33.18(30.26-36.11) |
| Tajikistan | 679(552-814) | 809.23(639.32- 999.85) | 590(380-764) | 555.54(350.24-741.29) | -10.02(-11.15--8.88) |
| Thailand | 15,266(12,143-18,553) | 1,792.90(1,343.41-2,336.79) | 74,311(57,461-94,422) | 1,971.38(1,403.10-2,635.33) | 4.01(2.42-5.59) |
| Timor-Leste | 45(33-57) | 1,048.98(721.82-1,429.96) | 304(229-394) | 1,273.25(909.88-1,764.52) | 7.15(6.97-7.32) |
| Togo | 191(153-247) | 715.82(523.89-967.51) | 726(518-986) | 1,011.29(679.88-1,439.14) | 9.68(9.30-10.06) |
| Tokelau | 0.66(0.53-0.81) | 1,564.82(1,175.40-2,080.36) | 0.81(0.63-1) | 1,469.57(1,049.51-1,978.90) | -2.73(-3.06--2.41) |
| Tonga | 14(11-16) | 1,009.22(732.12-1,334.41) | 30(24-39) | 1,132.44(814.97-1,534.36) | 4.27(3.76-4.78) |
| Trinidad and Tobago | 633(579-692) | 2,498.69(2,216.11-2,801.02) | 1,320(1,013-1,631) | 2,071.01(1,609.64-2,590.91) | -11.54(-15.38--7.69) |
| Tunisia | 1,612(1,294-1,957) | 1,268.21(932.53-1,654.17) | 4,549(3,400-6,111) | 1,155.20(795.72-1,631.60) | -4.46(-5.36--3.55) |
| T眉rkiye | 20,540(16,802-24,755) | 2,272.97(1,709.04-2,930.17) | 58,395(46,850-72,107) | 2,048.35(1,520.06-2,685.89) | -3.99(-6.56--1.42) |
| Turkmenistan | 330(284-376) | 626.42(536.21-717.85) | 497(391-632) | 538.33(419.70-688.74) | -1.34(-2.10--0.57) |
| Tuvalu | 1.8(1.4-2.3) | 1,510.54(1,102.14-2,066.06) | 4(3.1-5.2) | 1,533.95(1,119.17-2,065.70) | 0.74(0.62-0.86) |
| Uganda | 2,005(1,625-2,479) | 1,333.29(992.45-1,732.08) | 4,629(3,693-5,866) | 1,433.45(1,040.19-1,928.74) | 3.29(2.85-3.72) |
| Ukraine | 65,260(59,266-71,162) | 2,384.21(2,098.84-2,683.17) | 51,924(40,688-64,382) | 1,791.79(1,382.20-2,258.93) | -20.07(-23.86--16.29) |
| United Arab Emirates | 160(110-214) | 2,130.92(1,402.53-2,974.42) | 379(279-540) | 2,463.93(1,686.05-3,680.33) | 10.32(-11.81-32.45) |
| United Kingdom | 156,132(144,050-162,697) | 4,021.84(3,676.17-4,210.90) | 173,869(150,684-186,074) | 2,957.25(2,569.76-3,171.66) | -32.24(-34.22--30.25) |
| United Republic of Tanzania | 2,642(2,126-3,283) | 1,107.68(833.82-1,444.49) | 8,251(6,253-10,544) | 1,355.07(939.38-1,852.99) | 8.23(7.79-8.67) |
| United States of America | 435,716(382,839-464,950) | 3,335.49(2,908.48-3,586.75) | 453,047(382,069-493,830) | 1,951.58(1,644.57-2,134.75) | -44.11(-45.38--42.84) |
| United States Virgin Islands | 74(61-90) | 3,496.73(2,650.72-4,566.50) | 160(120-208) | 2,207.08(1,571.70-2,990.08) | -44.49(-48.52--40.47) |
| Uruguay | 6,072(5,417-6,695) | 4,081.49(3,474.83-4,667.92) | 11,613(9,962-13,218) | 4,593.30(3,797.01-5,399.79) | 15.50(8.79-22.20) |
| Uzbekistan | 2,208(1,842-2,576) | 587.18(489.90-689.00) | 2,873(2,297-3,465) | 487.16(386.20-594.40) | -2.27(-3.74--0.80) |
| Vanuatu | 15(11-20) | 1,383.12(972.45-1,938.15) | 48(36-61) | 1,390.13(1,008.38-1,913.75) | 0.22(0.07-0.37) |
| Venezuela (Bolivarian Republic of) | 3,445(3,065-3,869) | 1,236.34(1,071.93-1,405.34) | 13,038(9,883-16,848) | 1,450.49(1,090.12-1,878.71) | 8.25(6.59-9.91) |
| Viet Nam | 10,308(8,368-12,622) | 871.59(650.47-1,150.55) | 39,570(31,317-48,392) | 1,503.21(1,097.09-1,954.29) | 20.94(20.28-21.59) |
| Yemen | 757(573-1,016) | 786.48(547.68-1,117.26) | 2,840(1,948-3,890) | 900.74(587.35-1,312.82) | 3.71(3.49-3.92) |
| Zambia | 745(595-912) | 1,206.48(889.89-1,588.27) | 2,486(1,782-3,498) | 1,787.41(1,195.50-2,632.64) | 19.91(19.01-20.80) |
| Zimbabwe | 1,424(1,139-1,754) | 1,648.82(1,222.10-2,196.91) | 2,509(2,023-3,086) | 1,955.56(1,440.05-2,581.17) | 12.55(11.19-13.91) |

**Supplementary Table 5** Death of 204 countries and regions

| **Location** | **Cases (n),1990** | **Deaths(per 100,000 population),1990** | **Cases (n),2021** | **Deaths(per 100,000 population),2021** | **AAPC,1990–2021** |
| --- | --- | --- | --- | --- | --- |
| Afghanistan | 137(78-200) | 90.52(51.24-135.63) | 220(139-305) | 102.44(61.61-148.17) | 0.37(0.35-0.40) |
| Albania | 52(43-62) | 98.69(76.96-124.95) | 170(132-219) | 110.97(82.26-148.67) | 0.50(0.37-0.63) |
| Algeria | 164(136-201) | 78.99(59.18-104.49) | 553(427-694) | 70.61(50.31-97.34) | -0.21(-0.25--0.16) |
| American Samoa | 0.69(0.56-0.82) | 173.37(132.44-223.12) | 2.1(1.7-2.5) | 181.74(137.41-236.04) | 0.41(0.29-0.54) |
| Andorra | 5.6(4.1-7.8) | 321.28(219.17-454.44) | 14(10-18) | 226.66(155.11-316.68) | -2.81(-3.23--2.39) |
| Angola | 41(30-54) | 72.76(49.25-103.10) | 169(122-228) | 90.18(59.99-133.19) | 0.59(0.56-0.61) |
| Antigua and Barbuda | 3.6(3.2-3.9) | 154.43(134.92-174.45) | 6.1(5.4-6.8) | 201.96(174.64-229.88) | 1.92(1.50-2.35) |
| Argentina | 2,724(2,415-3,011) | 265.40(224.35-307.47) | 5,070(4,385-5,723) | 231.87(189.70-274.41) | -0.84(-1.07--0.60) |
| Armenia | 85(74-95) | 107.25(93.14-120.14) | 214(184-245) | 147.06(124.96-169.30) | 1.22(0.92-1.52) |
| Australia | 1,896(1,654-2,106) | 273.85(231.32-311.88) | 3,871(3,188-4,520) | 194.97(158.13-229.04) | -2.71(-2.90--2.52) |
| Austria | 1,665(1,487-1,817) | 324.99(277.83-367.22) | 1,447(1,192-1,697) | 167.23(135.52-197.86) | -4.93(-5.28--4.59) |
| Azerbaijan | 90(76-103) | 62.39(49.98-76.39) | 130(99-165) | 61.05(42.86-79.53) | -0.03(-0.09-0.02) |
| Bahamas | 6.5(5.9-7.3) | 144.46(124.28-165.77) | 23(19-27) | 211.39(170.38-257.51) | 2.14(1.49-2.80) |
| Bahrain | 3.9(3.2-4.7) | 166.20(125.84-212.72) | 14(12-18) | 165.31(122.04-225.33) | 0.15(-0.13-0.44) |
| Bangladesh | 434(330-553) | 34.76(24.57-48.43) | 1,316(1,008-1,772) | 34.89(24.57-49.24) | 0.07(0.03-0.12) |
| Barbados | 29(26-32) | 228.99(199.90-261.66) | 60(48-71) | 316.86(251.04-387.62) | 3.15(2.83-3.47) |
| Belarus | 673(591-759) | 141.07(121.27-163.62) | 998(788-1,221) | 177.18(138.31-219.08) | 2.05(1.87-2.15) |
| Belgium | 2,297(1,989-2,548) | 367.87(303.34-428.57) | 2,291(1,858-2,676) | 202.13(157.05-245.89) | -5.12(-5.36--4.89) |
| Belize | 2.4(2.2-2.7) | 74.61(64.56-85.10) | 8.4(7.1-9.7) | 104.47(86.54-121.26) | 0.86(0.64-1.07) |
| Benin | 32(26-38) | 56.75(43.14-73.87) | 89(70-110) | 74.50(54.43-101.55) | 0.59(0.56-0.61) |
| Bermuda | 7.4(6.6-8.1) | 373.93(318.95-434.47) | 16(13-21) | 275.89(214.74-352.52) | -3.27(-3.52--3.02) |
| Bhutan | 1.5(0.89-1.9) | 35.86(21.14-51.54) | 8.3(5.6-11) | 44.95(28.47-63.54) | 0.30(0.29-0.30) |
| Bolivia (Plurinational State of) | 117(79-160) | 149.38(94.59-213.92) | 426(281-576) | 178.58(114.93-255.99) | 0.97(0.94-1.01) |
| Bosnia and Herzegovina | 156(133-180) | 141.20(116.23-168.96) | 520(418-637) | 224.27(175.37-281.09) | 3.05(2.79-3.30) |
| Botswana | 11(8.1-14) | 112.19(77.80-154.34) | 37(29-47) | 124.58(89.41-174.37) | 0.31(0.10-0.51) |
| Brazil | 2,438(2,209-2,594) | 111.30(98.32-120.70) | 9,843(8,332-10,726) | 119.04(100.35-131.95) | 0.22(0.12-0.32) |
| Brunei Darussalam | 7.3(5.7-9) | 294.03(217.26-391.99) | 16(13-19) | 250.12(190.90-322.06) | -1.70(-2.06--1.35) |
| Bulgaria | 747(651-861) | 212.43(182.77-246.77) | 1,629(1,332-1,937) | 276.00(223.77-330.67) | 2.18(1.56-2.80) |
| Burkina Faso | 57(45-69) | 60.62(44.56-80.52) | 171(133-219) | 80.94(57.98-110.09) | 0.66(0.62-0.70) |
| Burundi | 46(36-58) | 83.58(60.96-111.61) | 80(59-107) | 93.18(63.58-132.04) | 0.31(0.27-0.35) |
| Cabo Verde | 4.7(3.9-5.6) | 49.85(37.37-65.10) | 20(15-25) | 144.63(99.15-193.11) | 3.20(3.01-3.40) |
| Cambodia | 97(70-126) | 106.15(73.27-146.93) | 381(286-486) | 144.62(102.61-198.45) | 1.26(1.24-1.28) |
| Cameroon | 71(57-87) | 76.60(57.48-100.23) | 236(178-314) | 94.39(65.10-132.77) | 0.59(0.55-0.62) |
| Canada | 3,041(2,697-3,302) | 256.65(220.39-290.60) | 6,289(5,280-7,185) | 202.31(162.75-239.47) | -1.94(-2.22--1.66) |
| Central African Republic | 12(9.2-17) | 83.09(56.39-122.55) | 23(16-32) | 82.93(53.43-125.33) | 0.00(-0.02-0.02) |
| Chad | 37(29-48) | 48.23(34.78-67.17) | 91(71-114) | 74.48(53.65-100.33) | 0.86(0.85-0.88) |
| Chile | 487(433-531) | 162.39(138.10-188.16) | 1,649(1,391-1,860) | 170.85(137.21-201.93) | 0.26(0.07-0.46) |
| China | 26,290(22,842-29,627) | 162.85(139.26-185.95) | 101,647(83,034-118,761) | 161.75(130.54-191.37) | -0.02(-0.16-0.12) |
| Colombia | 517(455-578) | 110.56(94.82-126.27) | 2,280(1,807-2,788) | 115.09(90.57-141.82) | -0.00(-0.11-0.11) |
| Comoros | 3.1(2.3-4.1) | 86.09(60.17-118.71) | 13(9.9-18) | 116.43(77.86-165.34) | 0.96(0.94-0.98) |
| Congo | 18(14-24) | 103.03(71.59-143.01) | 49(39-60) | 106.32(76.88-145.38) | 0.12(0.08-0.16) |
| Cook Islands | 0.29(0.24-0.34) | 96.14(70.57-124.93) | 0.68(0.53-0.84) | 73.98(53.35- 99.90) | -0.69(-0.72--0.66) |
| Costa Rica | 67(59-74) | 118.01(100.95-135.81) | 339(282-396) | 173.87(140.48-208.12) | 1.99(1.63-2.35) |
| Côte d'Ivoire | 28(23-33) | 45.20(33.70-59.90) | 97(79-125) | 46.56(33.97-63.36) | 0.03(0.01-0.06) |
| Croatia | 608(526-693) | 340.49(290.18-393.11) | 1,243(1,033-1,489) | 319.51(261.64-383.75) | -0.99(-1.94--0.04) |
| Cuba | 710(633-782) | 200.16(171.15-230.07) | 1,862(1,587-2,166) | 234.91(189.26-285.08) | 1.15(0.97-1.33) |
| Cyprus | 64(49-79) | 347.37(237.57-460.96) | 142(117-171) | 209.58(156.24-276.28) | -4.88(-5.23--4.52) |
| Czechia | 2,124(1,919-2,378) | 392.27(338.93-451.51) | 2,258(1,903-2,635) | 249.77(200.19-301.80) | -4.70(-5.06--4.35) |
| Democratic People's Republic of Korea | 358(267-489) | 106.16(74.40-150.34) | 952(623-1,441) | 88.61(54.90-141.78) | -0.59(-0.61--0.57) |
| Democratic Republic of the Congo | 145(108-197) | 67.13(46.83-99.31) | 423(285-666) | 69.06(41.85-116.43) | 0.07(0.06-0.09) |
| Denmark | 992(875-1,082) | 281.68(240.52-317.20) | 1,518(1,283-1,729) | 284.88(234.79-329.28) | 0.08(-0.35-0.52) |
| Djibouti | 1.7(1.3-2.3) | 93.24(64.72-133.37) | 13(9.6-17) | 145.11(100.95-201.53) | 1.70(1.68-1.72) |
| Dominica | 3.6(3-4.3) | 169.65(130.58-220.56) | 5.2(4.3-6.2) | 199.58(152.36-257.79) | 0.96(0.91-1.01) |
| Dominican Republic | 92(73-114) | 102.29(78.43-132.64) | 362(272-487) | 107.04(76.76-149.68) | 0.29(0.08-0.50) |
| Ecuador | 150(134-165) | 98.53(84.43-113.67) | 639(511-785) | 119.21(92.67-150.21) | 0.49(0.28-0.69) |
| Egypt | 226(190-292) | 53.00(40.43-71.64) | 949(763-1,136) | 95.38(71.53-120.90) | 1.39(1.31-1.47) |
| El Salvador | 52(45-59) | 53.90(43.50-65.19) | 211(167-259) | 83.97(63.81-107.78) | 0.95(0.84-1.07) |
| Equatorial Guinea | 2.6(1.9-3.4) | 76.55(52.08-108.50) | 12(8.5-16) | 118.52(79.13-170.21) | 1.38(1.33-1.43) |
| Eritrea | 8.8(6.7-12) | 82.07(57.84-113.68) | 52(39-67) | 127.30(87.92-175.48) | 1.51(1.49-1.54) |
| Estonia | 144(130-158) | 184.06(158.55-209.62) | 307(251-356) | 237.48(191.73-281.38) | 1.54(1.16-1.93) |
| Eswatini | 7.2(4.8-9.6) | 126.78(81.67-182.02) | 16(10-21) | 154.90(96.30-219.43) | 0.94(0.83-1.05) |
| Ethiopia | 600(394-729) | 215.54(141.56-269.37) | 2,191(1,844-2,610) | 211.81(170.04-260.72) | -0.05(-0.10-0.01) |
| Fiji | 5.6(4.3-7) | 90.47(66.26-120.16) | 16(12-21) | 113.05(79.50-152.78) | 0.73(0.65-0.81) |
| Finland | 554(485-602) | 198.03(167.00-225.76) | 951(754-1,104) | 155.92(122.44-185.72) | -1.59(-1.77--1.42) |
| France | 12,138(10,606-13,474) | 331.39(280.49-381.85) | 15,992(12,805-18,842) | 217.00(170.70-258.96) | -3.55(-3.70--3.41) |
| Gabon | 19(12-27) | 131.51(77.60-201.62) | 31(24-39) | 146.91(101.67-201.86) | 0.55(0.48-0.61) |
| Gambia | 2.2(1.8-2.7) | 29.52(21.74-39.18) | 8.5(6.5-11) | 34.60(24.66-47.73) | 0.17(0.16-0.18) |
| Georgia | 157(140-172) | 75.77(64.67-87.58) | 274(239-307) | 122.02(102.46-143.47) | 1.78(1.39-2.17) |
| Germany | 19,565(17,088-21,624) | 360.27(303.54-414.52) | 19,085(15,329-22,315) | 197.23(156.06-233.93) | -5.44(-5.69--5.18) |
| Ghana | 75(60-94) | 62.84(45.75-84.11) | 303(242-375) | 90.71(64.32-124.27) | 0.90(0.88-0.93) |
| Greece | 1,304(1,161-1,430) | 239.91(207.35-269.94) | 2,591(2,173-2,916) | 198.93(164.10-228.46) | -1.24(-1.58--0.89) |
| Greenland | 2.8(2.4-3.3) | 457.26(358.09-585.40) | 4.2(3.4-5.2) | 286.53(209.60-379.76) | -5.21(-5.60--4.83) |
| Grenada | 4.8(4.1-5.6) | 143.35(120.04-169.31) | 7(6-8.1) | 224.22(183.76-268.55) | 3.14(2.80-3.48) |
| Guam | 2.3(1.9-2.7) | 191.86(147.85-236.38) | 5.2(3.9-6.3) | 70.45(51.13-88.95) | -4.24(-4.84--3.64) |
| Guatemala | 42(38-46) | 63.27(55.86-71.45) | 254(220-292) | 77.80(65.47-91.84) | 0.66(0.41-0.90) |
| Guinea | 37(29-46) | 43.32(30.95-58.41) | 70(54-90) | 50.56(36.16-70.02) | 0.25(0.23-0.26) |
| Guinea-Bissau | 5.5(3.8-7) | 71.70(47.75-97.58) | 11(8.4-14) | 97.45(69.38-133.97) | 0.84(0.81-0.86) |
| Guyana | 12(10-13) | 119.48(100.59-139.59) | 21(17-26) | 138.86(106.62-175.11) | 0.65(0.35-0.94) |
| Haiti | 94(66-123) | 157.70(106.77-218.18) | 209(149-288) | 151.42(102.52-212.98) | -0.18(-0.20--0.15) |
| Honduras | 21(17-26) | 39.99(29.68-53.22) | 112(82-148) | 68.37(46.66-95.20) | 1.02(0.94-1.09) |
| Hungary | 1,945(1,630-2,234) | 360.48(298.94-420.35) | 2,274(1,881-2,732) | 272.75(224.12-328.77) | -2.67(-2.98--2.37) |
| Iceland | 23(20-26) | 200.98(168.30-233.61) | 41(32-50) | 165.91(129.42-201.22) | -0.98(-1.24--0.73) |
| India | 2,613(2,120-3,100) | 29.95(23.96-35.95) | 11,274(9,991-12,723) | 36.99(32.26-42.56) | 0.23(0.14-0.31) |
| Indonesia | 1,552(1,160-1,880) | 81.25(60.56-100.43) | 6,006(4,763-7,300) | 133.60(102.89-164.82) | 1.70(1.68-1.71) |
| Iran (Islamic Republic of) | 294(249-340) | 78.48(64.13-92.43) | 1,889(1,588-2,099) | 88.70(72.89-101.55) | 0.32(0.28-0.36) |
| Iraq | 98(77-123) | 41.05(29.71-54.85) | 330(257-399) | 66.90(47.87-87.45) | 0.93(0.87-0.99) |
| Ireland | 494(448-539) | 333.63(284.30-383.70) | 670(541-768) | 209.17(163.35-251.99) | -4.06(-4.43--3.70) |
| Israel | 522(450-595) | 306.44(252.13-359.51) | 1,095(829-1,307) | 212.40(159.99-258.40) | -2.99(-3.37--2.60) |
| Italy | 8,944(7,941-9,523) | 254.43(221.05-274.79) | 15,267(12,263-17,064) | 202.53(164.10-226.67) | -1.28(-2.04--0.83) |
| Jamaica | 99(87-111) | 140.19(116.96-164.27) | 197(157-251) | 168.01(129.45-216.53) | 1.07(0.67-1.46) |
| Japan | 13,134(11,669-13,936) | 232.69(202.98-249.41) | 46,058(35,684-51,842) | 209.79(164.47-235.05) | -0.90(-1.01--0.80) |
| Jordan | 26(21-32) | 100.73(73.30-132.23) | 152(111-206) | 101.71(70.55-142.77) | 0.05(-0.12-0.22) |
| Kazakhstan | 459(395-526) | 118.07(100.50-135.48) | 424(356-492) | 97.99(82.05-114.07) | -0.43(-0.61--0.25) |
| Kenya | 70(56-91) | 38.07(30.06-49.58) | 306(248-374) | 72.56(57.03-89.78) | 1.12(1.05-1.18) |
| Kiribati | 0.53(0.41-0.71) | 82.41(58.05-113.66) | 1.1(0.88-1.4) | 94.76(69.28-127.76) | 0.40(0.39-0.42) |
| Kuwait | 7.4(6.2-8.2) | 67.68(54.87-79.73) | 69(55-84) | 113.23(86.68-143.29) | 1.69(1.20-2.18) |
| Kyrgyzstan | 74(62-85) | 78.31(65.03-91.54) | 66(52-83) | 64.06(50.70-80.76) | -0.39(-0.50--0.28) |
| Lao People's Democratic Republic | 43(26-58) | 108.11(66.10-154.56) | 128(95-164) | 128.77(88.39-175.88) | 0.67(0.65-0.68) |
| Latvia | 238(211-265) | 171.86(146.79-198.10) | 372(305-442) | 193.93(154.24-235.14) | 0.83(0.59-1.08) |
| Lebanon | 84(59-106) | 158.04(108.21-207.46) | 392(307-514) | 153.88(111.83-208.60) | -0.20(-0.30--0.10) |
| Lesotho | 17(13-23) | 78.61(54.72-111.44) | 29(21-41) | 138.04(92.03-206.15) | 1.95(1.84-2.07) |
| Liberia | 17(13-21) | 61.29(45.27-81.70) | 30(20-44) | 71.21(44.22-108.56) | 0.30(0.28-0.33) |
| Libya | 74(55-99) | 145.52(101.73-200.91) | 199(143-264) | 155.01(107.80-216.35) | 0.88(0.49-1.27) |
| Lithuania | 284(257-312) | 165.48(143.25-188.73) | 566(460-679) | 203.98(163.72-247.65) | 1.08(0.87-1.29) |
| Luxembourg | 73(66-79) | 350.07(308.71-391.97) | 101(86-113) | 221.35(183.55-252.67) | -4.04(-4.52--3.55) |
| Madagascar | 78(64-93) | 73.84(54.84-96.55) | 137(99-176) | 87.28(60.10-121.27) | 0.47(0.43-0.50) |
| Malawi | 27(23-33) | 39.87(29.79-52.30) | 66(52-86) | 46.53(33.57-64.64) | 0.23(0.21-0.26) |
| Malaysia | 405(329-485) | 158.77(118.56-207.38) | 1,581(1,283-1,860) | 213.93(161.70-278.86) | 1.66(1.24-2.08) |
| Maldives | 0.95(0.73-1.2) | 70.16(49.96-96.20) | 5.3(4.3-6.5) | 61.02(44.32-79.06) | -0.31(-0.36--0.27) |
| Mali | 53(44-65) | 72.90(54.18-95.28) | 145(115-183) | 80.81(58.13-110.56) | 0.28(0.25-0.31) |
| Malta | 35(30-40) | 245.18(203.90-286.24) | 82(64-97) | 189.37(146.95-226.22) | -1.80(-2.09--1.50) |
| Marshall Islands | 0.39(0.31-0.48) | 117.85(86.18-156.55) | 0.52(0.4-0.67) | 124.68(89.12-169.13) | 0.18(0.14-0.22) |
| Mauritania | 18(14-22) | 73.48(53.27-98.05) | 52(37-68) | 95.53(66.42-133.50) | 0.72(0.69-0.75) |
| Mauritius | 15(14-16) | 89.14(77.24-101.16) | 80(70-88) | 149.17(127.53-169.37) | 1.67(1.43-1.91) |
| Mexico | 955(901-999) | 86.53(80.71-91.31) | 3,461(3,099-3,813) | 88.20(78.01-97.69) | 0.06(-0.02-0.14) |
| Micronesia (Federated States of) | 1.5(1.2-1.9) | 130.71(95.64-178.12) | 1.5(1.1-2) | 134.29(91.11-188.02) | 0.12(0.10-0.13) |
| Monaco | 11(8.2-13) | 316.75(226.26-417.45) | 17(13-21) | 362.16(264.00-472.89) | 1.52(1.45-1.58) |
| Mongolia | 17(13-21) | 54.90(41.24-71.26) | 36(28-45) | 74.06(56.57-94.78) | 0.57(0.46-0.68) |
| Montenegro | 32(28-38) | 153.64(124.52-189.09) | 74(61-87) | 242.82(187.91-296.89) | 3.32(2.98-3.65) |
| Morocco | 228(182-282) | 57.86(41.22-78.43) | 806(606-1,035) | 87.72(61.36-121.65) | 0.97(0.95-0.98) |
| Mozambique | 47(38-56) | 44.10(32.39-57.64) | 104(78-131) | 56.43(38.51-77.98) | 0.43(0.41-0.46) |
| Myanmar | 444(307-639) | 94.39(61.48-139.20) | 1,380(1,007-1,781) | 115.18(79.14-157.45) | 0.68(0.66-0.69) |
| Namibia | 6(4.8-7.6) | 53.32(38.93-71.38) | 19(15-23) | 63.26(45.74-83.93) | 0.35(0.33-0.38) |
| Nauru | 0.11(0.073-0.16) | 179.75(113.42-267.06) | 0.16(0.11-0.21) | 169.37(102.93-233.50) | -0.34(-0.37--0.32) |
| Nepal | 57(43-75) | 32.60(22.44-45.49) | 225(167-299) | 39.55(27.65-55.74) | 0.22(0.21-0.23) |
| Netherlands | 2,555(2,232-2,819) | 324.06(271.78-370.47) | 4,187(3,469-4,786) | 279.37(224.85-329.63) | -1.49(-1.98--1.00) |
| New Zealand | 486(416-552) | 341.75(285.70-398.89) | 942(778-1,103) | 271.86(219.15-324.54) | -2.36(-2.80--1.91) |
| Nicaragua | 21(17-24) | 50.24(38.74-64.45) | 88(71-108) | 62.04(45.27-82.59) | 0.41(0.34-0.49) |
| Niger | 25(18-32) | 51.40(34.85-71.67) | 104(78-140) | 66.16(45.96-94.28) | 0.47(0.44-0.49) |
| Nigeria | 634(523-758) | 59.99(49.01-72.17) | 1,464(1,272-1,663) | 74.27(63.37-86.18) | 0.46(0.44-0.48) |
| Niue | 0.13(0.1-0.15) | 128.54(94.37-171.12) | 0.1(0.08-0.12) | 142.69(105.61-187.86) | 0.42(0.39-0.45) |
| North Macedonia | 95(81-114) | 178.93(145.88-222.08) | 230(188-276) | 264.30(212.25-320.81) | 3.01(2.62-3.41) |
| Northern Mariana Islands | 0.37(0.3-0.46) | 183.13(136.66-242.77) | 1.5(1.3-1.8) | 190.21(143.68-245.63) | -0.47(-0.97-0.03) |
| Norway | 923(810-987) | 306.46(268.84-332.20) | 1,258(1,032-1,392) | 280.85(229.72-313.44) | -1.01(-1.29--0.73) |
| Oman | 5.8(4.4-7.5) | 38.89(27.26-53.74) | 15(11-20) | 44.86(29.43-62.25) | 0.21(0.09-0.33) |
| Pakistan | 696(554-816) | 48.44(37.38-60.47) | 1,605(1,317-1,950) | 63.22(49.90-80.13) | 0.49(0.47-0.50) |
| Palau | 0.41(0.3-0.53) | 189.02(127.76-269.25) | 0.71(0.54-0.92) | 190.74(132.82-264.16) | -0.01(-0.09-0.06) |
| Palestine | 47(38-57) | 211.86(154.30-280.06) | 96(81-114) | 186.53(144.06-240.93) | -0.83(-0.97--0.69) |
| Panama | 45(40-50) | 96.31(81.63-108.97) | 205(155-246) | 124.32(93.36-151.31) | 1.00(0.87-1.13) |
| Papua New Guinea | 7.9(5.8-11) | 34.98(24.63-48.56) | 27(20-35) | 34.43(24.48-46.81) | -0.02(-0.02--0.01) |
| Paraguay | 49(40-58) | 73.25(55.72-92.54) | 222(171-281) | 124.48(89.99-168.77) | 1.63(1.46-1.79) |
| Peru | 357(304-423) | 99.39(78.16-123.61) | 1,391(1,055-1,769) | 117.83(84.22-157.66) | 1.00(0.71-1.28) |
| Philippines | 660(583-807) | 107.69(93.18-134.82) | 2,253(1,947-2,592) | 118.38(100.61-138.04) | 0.36(0.27-0.44) |
| Poland | 3,691(3,445-3,877) | 241.17(222.15-254.68) | 8,771(7,715-9,563) | 313.21(273.43-344.08) | 2.34(2.16-2.52) |
| Portugal | 1,491(1,336-1,643) | 323.08(276.57-372.93) | 2,924(2,357-3,327) | 235.57(187.82-279.75) | -2.77(-3.02--2.52) |
| Puerto Rico | 220(195-245) | 179.35(153.55-205.65) | 525(429-634) | 148.34(117.21-182.74) | -0.94(-1.29--0.59) |
| Qatar | 2.2(1.7-2.6) | 192.05(138.85-256.30) | 13(10-18) | 166.88(117.92-241.02) | -1.02(-1.64--0.41) |
| Republic of Korea | 976(828-1,112) | 161.73(127.10-201.49) | 6,549(5,171-7,964) | 195.58(145.38-250.54) | 1.12(1.00-1.24) |
| Republic of Moldova | 194(174-213) | 157.52(134.76-181.26) | 287(245-337) | 139.10(114.51-166.35) | -0.69(-0.97--0.41) |
| Romania | 928(789-1,090) | 103.70(86.10-122.87) | 3,353(2,804-4,014) | 215.55(178.60-259.16) | 3.66(3.45-3.88) |
| Russian Federation | 9,412(8,896-9,855) | 152.35(141.92-160.59) | 17,892(16,035-19,331) | 219.93(196.82-239.40) | 2.21(2.04-2.39) |
| Rwanda | 46(36-56) | 95.88(69.42-127.57) | 129(91-170) | 111.62(73.70-158.86) | 0.49(0.44-0.53) |
| Saint Kitts and Nevis | 2.7(2.5-3) | 205.83(181.51-231.40) | 3.2(2.8-3.6) | 221.43(188.41-254.94) | 0.46(0.06-0.86) |
| Saint Lucia | 4.1(3.6-4.5) | 164.99(146.23-184.59) | 12(10-14) | 147.55(121.23-176.83) | -0.91(-1.07--0.75) |
| Saint Vincent and the Grenadines | 3.5(3.2-3.9) | 153.70(134.38-174.50) | 7.6(6.7-8.6) | 170.79(146.90-196.14) | 0.29(-0.09-0.67) |
| Samoa | 2.1(1.7-2.5) | 107.80(78.89-143.36) | 3.9(3.1-4.7) | 103.29(76.59-135.75) | -0.15(-0.16--0.13) |
| San Marino | 5.1(4-6.3) | 352.18(265.21-456.30) | 6.3(4.4-8.7) | 161.34(105.25-230.04) | -6.89(-7.45--6.33) |
| Sao Tome and Principe | 2(1.6-2.3) | 107.34(79.60-140.72) | 3.6(2.9-4.6) | 143.92(104.77-197.08) | 1.11(1.01-1.22) |
| Saudi Arabia | 77(58-99) | 60.87(43.10-85.02) | 179(146-217) | 79.64(59.26-105.53) | 0.63(0.61-0.64) |
| Senegal | 49(40-60) | 63.73(47.46-83.50) | 169(126-216) | 90.74(64.32-125.00) | 0.88(0.86-0.90) |
| Serbia | 779(649-964) | 335.31(266.14-426.57) | 1,555(1,286-1,853) | 232.87(181.07-296.34) | -3.36(-3.73--2.98) |
| Seychelles | 3.4(2.9-4) | 167.86(127.27-218.65) | 7.4(6.2-8.6) | 235.97(180.97-303.52) | 1.82(1.17-2.47) |
| Sierra Leone | 31(24-38) | 53.73(38.51-72.22) | 61(47-79) | 67.86(47.51-94.39) | 0.47(0.45-0.49) |
| Singapore | 140(122-158) | 248.16(210.90-287.54) | 479(389-560) | 173.84(137.14-211.59) | -2.42(-2.67--2.17) |
| Slovakia | 612(514-723) | 274.90(216.79-338.94) | 997(784-1,244) | 290.09(219.00-374.41) | 0.59(0.31-0.86) |
| Slovenia | 242(216-267) | 248.62(210.91-287.94) | 476(377-578) | 235.57(185.25-288.38) | -0.23(-0.68-0.23) |
| Solomon Islands | 1.8(1.4-2.3) | 96.19(68.69-132.47) | 6.4(4.9-8.3) | 100.73(70.94-139.68) | 0.15(0.12-0.17) |
| Somalia | 29(20-42) | 82.10(53.17-124.59) | 68(43-98) | 95.42(57.93-144.33) | 0.44(0.41-0.47) |
| South Africa | 579(484-769) | 105.60(86.17-141.50) | 1,511(1,348-1,658) | 130.82(113.54-147.20) | 0.95(0.78-1.12) |
| South Sudan | 51(36-71) | 89.97(59.33-130.02) | 84(59-110) | 120.62(81.45-167.17) | 1.03(1.01-1.06) |
| Spain | 5,371(4,648-5,935) | 264.25(224.16-301.08) | 11,375(8,933-13,414) | 227.66(178.61-273.73) | -1.10(-1.23--0.97) |
| Sri Lanka | 139(119-165) | 56.75(43.70-72.84) | 374(264-495) | 48.00(31.31-66.94) | -0.32(-0.41--0.22) |
| Sudan | 123(90-168) | 57.02(38.34-83.04) | 316(220-441) | 69.06(45.05-100.61) | 0.39(0.38-0.39) |
| Suriname | 10(8.8-12) | 143.98(112.96-182.72) | 30(22-38) | 151.39(104.08-208.52) | 0.11(-0.28-0.51) |
| Sweden | 1,661(1,440-1,849) | 244.84(204.82-283.05) | 2,359(1,863-2,831) | 221.46(173.55-270.79) | -0.58(-0.82--0.33) |
| Switzerland | 879(762-978) | 191.72(160.55-220.34) | 1,327(1,020-1,591) | 149.35(114.40-180.97) | -1.10(-1.32--0.88) |
| Syrian Arab Republic | 82(65-100) | 67.56(51.30-86.48) | 213(162-283) | 77.79(56.76-104.86) | 0.23(0.18-0.29) |
| Taiwan (Province of China) | 624(563-676) | 108.86(90.25-126.91) | 4,537(3,739-5,287) | 207.26(162.19-254.70) | 3.02(2.71-3.33) |
| Tajikistan | 49(40-59) | 58.96(46.16-73.24) | 43(28-56) | 40.76(25.09-54.70) | -0.73(-0.82--0.63) |
| Thailand | 1,146(913-1,385) | 140.29(104.09-183.43) | 5,778(4,431-7,254) | 151.62(107.28-203.27) | 0.23(0.11-0.35) |
| Timor-Leste | 3.5(2.5-4.4) | 80.69(55.21-110.51) | 21(16-27) | 97.87(69.86-136.16) | 0.54(0.53-0.56) |
| Togo | 14(11-18) | 54.77(39.84-74.32) | 52(37-70) | 78.74(52.70-112.84) | 0.78(0.75-0.81) |
| Tokelau | 0.049(0.04-0.059) | 122.00(91.15-163.08) | 0.063(0.049-0.078) | 115.77(82.46-156.11) | -0.16(-0.20--0.13) |
| Tonga | 1(0.82-1.2) | 80.37(57.95-107.43) | 2.4(1.9-3.1) | 90.73(64.47-123.90) | 0.36(0.32-0.40) |
| Trinidad and Tobago | 47(43-51) | 203.36(179.96-227.83) | 99(77-123) | 158.44(123.23-197.07) | -1.20(-1.50--0.90) |
| Tunisia | 114(92-138) | 97.52(70.88-128.09) | 346(261-455) | 89.70(61.49-126.39) | -0.30(-0.39--0.22) |
| Türkiye | 1,551(1,267-1,875) | 176.23(131.03-228.70) | 4,410(3,501-5,429) | 157.93(116.42-207.65) | -0.29(-0.49--0.09) |
| Turkmenistan | 23(20-27) | 45.74(38.97-52.40) | 36(29-46) | 38.87(30.37-49.53) | -0.11(-0.17--0.06) |
| Tuvalu | 0.13(0.1-0.16) | 116.17(84.20-160.38) | 0.3(0.23-0.38) | 120.12(87.35-162.39) | 0.13(0.12-0.14) |
| Uganda | 144(116-177) | 103.11(76.11-134.49) | 346(277-438) | 112.91(81.36-152.85) | 0.32(0.29-0.35) |
| Ukraine | 4,536(4,118-4,925) | 173.37(151.31-195.79) | 3,809(2,999-4,711) | 129.66(100.11-163.85) | -1.52(-1.79--1.24) |
| United Arab Emirates | 11(7.8-15) | 159.51(105.41-223.08) | 25(19-36) | 179.33(121.10-269.78) | 0.39(-1.37-2.15) |
| United Kingdom | 11,735(10,740-12,239) | 311.39(280.64-326.98) | 13,928(11,892-14,953) | 233.14(199.24-250.81) | -2.54(-2.72--2.35) |
| United Republic of Tanzania | 188(151-231) | 86.07(64.39-112.76) | 626(472-799) | 107.69(74.46-147.46) | 0.73(0.71-0.76) |
| United States of America | 32,473(27,919-34,784) | 252.57(216.01-272.20) | 35,143(28,959-38,553) | 149.19(122.99-163.85) | -3.29(-3.39--3.20) |
| United States Virgin Islands | 5.4(4.5-6.6) | 275.66(207.52-362.67) | 12(9-16) | 178.05(125.97-240.97) | -3.39(-3.70--3.08) |
| Uruguay | 462(411-509) | 320.45(269.91-368.58) | 941(802-1,071) | 362.72(298.30-429.53) | 1.53(1.24-1.83) |
| Uzbekistan | 157(131-183) | 42.07(34.91-49.54) | 207(165-249) | 35.57(28.14-43.31) | -0.23(-0.31--0.16) |
| Vanuatu | 1(0.77-1.4) | 107.04(75.08-150.74) | 3.4(2.6-4.4) | 108.44(78.13-150.16) | 0.05(0.04-0.06) |
| Venezuela (Bolivarian Republic of) | 258(229-289) | 95.37(81.91-108.80) | 982(743-1,265) | 109.69(82.25-141.91) | 0.60(0.47-0.73) |
| Viet Nam | 765(626-934) | 66.82(49.52-88.68) | 2,958(2,359-3,625) | 114.09(82.88-149.31) | 1.56(1.52-1.61) |
| Yemen | 53(41-72) | 60.03(41.53-85.80) | 205(141-282) | 69.33(44.80-102.00) | 0.30(0.29-0.32) |
| Zambia | 54(43-65) | 93.05(68.48-122.79) | 181(131-250) | 139.39(93.49-203.53) | 1.50(1.41-1.60) |
| Zimbabwe | 102(81-126) | 126.57(93.22-169.65) | 174(142-214) | 146.72(107.37-194.65) | 0.94(0.82-1.07) |
